# Supplementary material for: Progressive remote memory decline coincides with parvalbumin interneuron hyperexcitability and enhanced inhibition of cortical engram cells in a mouse model of Alzheimer’s disease
Source: eLife. 2025 Nov 21;14:RP106866. doi: 10.7554/eLife.106866 (PMC12638044; doi:10.7554/eLife.106866)
Supplement: Figure 1—figure supplement 1—source data 1. [file elife-106866-fig1-figsupp1-data1.xlsx]

## Sheet: Sheet1
Sup. Fig. 1: Amyloid beta plaque load in mPFC at 16 and 20 weeks of age does not differ
Panel b				Panel c
group	Animal	Plaque area (um)		group	Animal	Plaque freq.
16w	35	527.287		16w	35	3
	35	305.827			36	1
	35	414.018			46	1
	36	315.982			47	0
	46	517.523			48	1
	48	404.253			49	3
	49	673.365
	49	368.71
	49	305.827
average		425.866		average		1.5
SEM		41.6184		SEM		0.5
group	Animal	Plaque area (um)		group	Animal	Plaque freq.
20w	17	571.032		20w	17	1
	18	640.556			18	3
	18	253.098			19	1
	18	382.771			20	4
	19	318.325			21	0
	20	388.24			22	4
	20	638.603			23	0
	20	530.802			32	0
	20	779.994			33	0
	22	415.58
	22	445.265
	22	560.096
	22	293.328
average		478.284		average		1.44444
SEM		43.4029		SEM		0.580017
