# Supplementary material for: Progressive remote memory decline coincides with parvalbumin interneuron hyperexcitability and enhanced inhibition of cortical engram cells in a mouse model of Alzheimer’s disease
Source: eLife. 2025 Nov 21;14:RP106866. doi: 10.7554/eLife.106866 (PMC12638044; doi:10.7554/eLife.106866)
Supplement: Figure 1—source data 1. [file elife-106866-fig1-data1.xlsx]

## Sheet: Sheet1
Fig 1 Progressive remote memory decline in APP/PS1 mice
Panel b				Panel c
group	Animal	Freezing (%)		group	Animal	Freezing (%)
WT	1	44.2		WT	16	37.1183
	2	94.2			17	53.9145
	3	65.6			18	57.7179
	4	14.4			19	50.4442
	5	86.4			20	29.0117
	6	2.8			21	47.1127
	7	48.7			22	1.58245
					23	84.925
average		50.9		average		45.2283
SEM		12.953		SEM		8.52699
group	Animal	Freezing (%)		group	Animal	Freezing (%)
APP/PS1	8	9.2		APP/PS1	24	0
	9	27.1			25	0
	10	43.5			26	35.5358
	11	68.7			27	1.44364
	12	9.2			28	20.683
	13	27.1			29	13.5203
	14	43.5			30	3.58134
	15	68.7			31	3.05386
					32	12.8056
average		37.125		average		10.0693
SEM		8.27632		SEM		3.99493
