# Supplementary material for: Progressive remote memory decline coincides with parvalbumin interneuron hyperexcitability and enhanced inhibition of cortical engram cells in a mouse model of Alzheimer’s disease
Source: eLife. 2025 Nov 21;14:RP106866. doi: 10.7554/eLife.106866 (PMC12638044; doi:10.7554/eLife.106866)
Supplement: Figure 2—figure supplement 1—source data 1. [file elife-106866-fig2-figsupp1-data1.xlsx]

## Sheet: Sheet1
sFig 2 SST cell excitability is unaltered in the mPFC of 20-week-old APP/PS1 mice
Panel b+e	see Tabel S5
Group	Cell	_2022_02_07_152735-compressed.nwb	_2022_02_09_172434-compressed.nwb	_2022_02_15_115052-compressed.nwb	_2022_02_15_132532-compressed.nwb	_2022_02_16_151858-compressed.nwb	_2022_02_17_125107-compressed.nwb		_2022_02_17_162051-compressed.nwb	_2022_02_17_163929-compressed.nwb	_2022_02_22_175346-compressed.nwb	_2022_02_23_122602-compressed.nwb	_2022_02_23_131225-compressed.nwb	_2022_02_23_135104-compressed.nwb	_2022_02_23_151429-compressed.nwb	_2022_02_26_125133-compressed.nwb	_2022_02_26_134130-compressed.nwb	_2022_02_26_150227-compressed.nwb				Average	SEM
SST-Cre	0pA	0	0	0	0	0	0	0	0	0	0	0	0	0	0	9.97563	0	0				0.586802	0.586802
	25pA	0	0	6.89565	0	0	0	0	0	0	0	0	0	0	0	13.8808	0	0				1.22214	0.888723
	50pA	0	0	21.3251	0	0	0	0	0	0	0	0	9.63183	0	7.40775	19.5205	0	3.57839				3.6155	1.68693
	75pA	0	2.78247	31.8672	14.9771	0	0	0	0	5.76509	7.39225	12.2468	17.6621	15.1317	16.0948	24.4681	0	12.9928				9.49296	2.36466
	100pA	9.12899	13.1826	38.6963	33.7589	21.0015	0	0	6.14113	12.4264	12.8316	16.466	24.1248	28.6201	22.6313	31.9317	0	18.5959				17.0316	2.9146
	125pA	18.7785	21.0473	41.2806	49.5034	41.7766	7.39791	0	14.3552	17.8912	19.178	21.383	29.5888	42.2161	28.2235	35.9041	8.80271	23.3742				24.7471	3.35277
	150pA	30.8766	26.559	54.7259	63.6317	53.4024	16.5687	0	19.2049	23.3841	28.9037	24.5373	34.44	55.9478	32.731	38.7492	15.707	26.3194				32.0993	4.06492
	175pA	43.5365	33.2784	66.7007	76.4421	62.2563	22.5698	0	23.3156	27.3858	32.1845	27.5658	37.1086	64.679	36.4404	40.6062	30.4313	28.3997				38.4059	4.68271
	200pA	52.8383	36.9124	72.6509	89.7333	72.6287	27.9009	41.7053	27.4665	29.7893	34.8315	29.5413	39.9751	75.1126	40.2881	45.9751	29.2465	30.6836				45.7223	4.78956
	225pA	60.6106	41.2282	78.3478	99.1561	80.3037	34.1569	53.3092	29.8688	35.3463	38.2075	30.3047	42.9304	81.924	43.262	48.2479	35.0581	32.7538				50.8833	5.20241
	250pA	69.4228	43.5131	84.8297	109.102	85.5831	39.6202	62.5617	32.6105	39.18	41.4597	32.1808	43.5581	88.1414	45.8565	49.7238	36.7067	43.123				55.716	5.63899
Group	Cell	_2022_02_08_154739-compressed.nwb	_2022_02_09_152858-compressed.nwb	_2022_02_09_162914-compressed.nwb	_2022_02_09_170601-compressed.nwb	_2022_02_16_120227-compressed.nwb	_2022_02_16_124759-compressed.nwb	_2022_02_16_140552-compressed.nwb	_2022_02_16_142616-compressed.nwb	_2022_02_17_171813-compressed.nwb	_2022_02_21_155547-compressed.nwb	_2022_02_22_132149-compressed.nwb	_2022_02_22_141845-compressed.nwb	_2022_02_23_173035-compressed.nwb	_2022_02_26_162834-compressed.nwb	_2022_02_27_113842-compressed.nwb	_2022_02_27_133038-compressed.nwb					Average	SEM
APP/PS1-SST-Cre	0pA	0	0	0	0	0	0	0	0	0	0	0	0	0	0	0	0					0	0
	25pA	0	0	0	0	0	0	0	0	1.93573	0	6.11304	0	0	0	0	0					0.503048	0.392998
	50pA	4.23118	0	0	0	15.9032	0	0	0	12.9314	15.7873	19.2483	0	9.76932	0	0	15.5273					5.83738	1.88095
	75pA	20.3428	0	0	0	29.665	0	10.8543	4.28082	20.7906	31.3343	17.9382	0	21.0892	3.11297	6.59815	21.5849					11.7245	2.83603
	100pA	26.2943	0	7.80089	4.67727	40.7661	7.62195	27.2211	13.5825	29.411	47.2676	25.9062	0	28.9581	13.064	16.9908	29.7865					19.9593	3.5362
	125pA	30.9632	16.6473	14.8261	16.9103	47.8667	24.0222	42.6367	26.9985	34.1405	57.5122	28.9273	0.835282	32.3266	20.4137	26.2484	28.7652					28.1275	3.40775
	150pA	33.4174	33.7828	22.3687	24.6298	51.4454	39.4643	55.2636	36.4037	37.9404	68.8081	33.6288	10.0073	35.4933	24.5964	34.0978	38.2674					36.2259	3.44487
	175pA	36.1561	46.7127	26.6828	31.7699	56.0143	53.4198	64.6661	44.9189	40.2141	75.1722	36.6078	15.3924	39.1065	28.6446	42.1481	43.5365					42.5727	3.69077
	200pA	37.1236	59.0129	30.5755	40.0089	57.8553	65.5516	75.0513	52.4703	42.6405	80.4047	38.0969	22.0849	40.741	37.8746	49.9798	46.5718					48.5027	3.96315
	225pA	38.1154	72.4928	34.5659	45.3065	65.8061	75.8842	85.144	58.9874	43.3051	79.5406	41.4488	26.6514	44.7681	41.9485	54.4715	49.925					53.6476	4.36758
	250pA	37.8991	79.6238	38.7914	50.1482	66.3979	84.8897	90.8873	64.7447	50.6809	88.0255	43.0812	30.2587	43.9236	59.0893	58.4978	55.1802					58.8825	4.72812
