# Supplementary material for: Progressive remote memory decline coincides with parvalbumin interneuron hyperexcitability and enhanced inhibition of cortical engram cells in a mouse model of Alzheimer’s disease
Source: eLife. 2025 Nov 21;14:RP106866. doi: 10.7554/eLife.106866 (PMC12638044; doi:10.7554/eLife.106866)
Supplement: Figure 2—source data 1. [file elife-106866-fig2-data1.xlsx]

## Sheet: Sheet1
Panel b + e	see Tabel 1A
Fig 2 APP/PS1 mice show an age-dependent increase in PV interneuron excitability
Panel f + i	see Tabel 1B
Panel j + m	see Tabel 1C
panel n + q	see Tabel 1D
Panel d
Group	Cell	'_2024_07_02_144512-compressed.nwb'	'_2024_07_03_112747-compressed.nwb'	'_2024_07_03_114658-compressed.nwb'	'_2024_07_03_130543-compressed.nwb'	'_2024_07_03_132905-compressed.nwb'	'_2024_07_03_143406-compressed.nwb'	'_2024_07_03_151922-compressed.nwb'	'_2024_07_03_155326-compressed.nwb'	'_2024_07_04_161608-compressed.nwb'	'_2024_07_09_114449-compressed.nwb'	'_2024_07_09_121213-compressed.nwb'	'_2024_07_09_132054-compressed.nwb'	'_2024_07_09_135139-compressed.nwb'	'_2024_07_09_142026-compressed.nwb'	'_2024_07_09_143349-compressed.nwb'	'_2024_07_09_144632-compressed.nwb'	'_2024_07_09_153304-compressed.nwb'	'_2024_07_09_154705-compressed.nwb'	'_2024_07_11_142832-compressed.nwb'	'_2024_07_15_131146-compressed.nwb'	'_2024_07_15_133559-compressed.nwb'	'_2024_07_15_135431-compressed.nwb'	'_2024_07_16_144922-compressed.nwb'	'_2024_07_17_130021-compressed.nwb'	'_2024_07_17_133423-compressed.nwb'	'_2024_07_17_141051-compressed.nwb'	'_2024_07_17_143021-compressed.nwb'	'_2024_07_17_152708-compressed.nwb'	'_2024_07_17_154451-compressed.nwb'			Average	SEM
Parv Cre tdtomato	0pA	0	0	0	0	0	0	0	0	0	0	0	0	0	0	0	0	0	0	0	0	0	0	0	0	0	0	0	0	0			0	0
	25pA	0	0	0	0	0	0	0	0	0	0	0	0	0	0	0	0	0	0	0	0	0	0	0	0	0	0	0	0	0			0	0
	50pA	0	0	0	0	0	0	0	0	0	0	0	0	0	0	0	0	0	0	0	0	0	0	0	0	0	0	0	0	0			0	0
	75pA	0	0	0	0	0	0	0	0	0	0	0	0	0	0	0	0	0	0	0	0	0	0	0	0	0	0	0	0	0			0	0
	100pA	2.06228	0	0	0	0	0	0	0	0	0	0	0	0	0	0	0	0	0	0	0	0	0	0	0	0	0	0	0	0			0.0711131	0.0711131
	125pA	12.6604	0	0	0	0	0	0	0	0	0	0	0	0	0	0	8.61623	0	0	0	0	0	0	0	0	0	0	0	0	0			0.733678	0.519231
	150pA	30.7879	0	0	0	0	0	0	0	6.26426	0	0	0	0	0	0	30.8137	0	0	14.3208	0	42.7156	0	0	0	0	0	0	0	0			4.30698	2.05479
	175pA	49.4782	0	0	0	0	0	0	0	72.2291	0	0	0	0	0	0	45.6637	0	0	46.2309	0	63.3534	0	0	16.1089	33.6705	0	0	0	58.2776			13.2763	4.38021
	200pA	65.0163	0	0	0	0	0	0	0	86.5406	57.5217	0	0	0	0	0	62.0317	0	0	96.9179	0	82.0977	0	48.6665	42.9586	46.8973	0	0	0	72.5682			22.8006	6.23922
	225pA	77.2326	0	0	0	0	0	66.6368	0	99.2282	83.2185	37.4935	0	0	33.3017	0	76.9759	0	0	118.517	0	97.3039	0	62.6045	59.6244	62.9281	0	0	43.277	84.1085			34.5673	7.43285
	250pA	87.2881	34.7222	34.6443	0	39.0069	0	87.6344	0	108.215	112.152	57.1916	0	0	55.6895	0	90.1389	0	0	143.577	0	112.877	0	73.9228	76.4665	80.9653	46.3787	0	56.2872	94.3248			47.9821	8.35517
	275pA	96.5589	42.5517	48.6743	0	44.3728	0	104.716	0	117.877	132.35	74.4272	65.2062	0	71.9528	0	103.609	0	0	161.431	64.7622	125.412	0	85.2393	85.5084	97.9291	60.7183	57.4318	69.6239	103.633			62.5512	8.79487
	300pA	104.741	55.6978	62.8874	28.2213	58.2343	0	120.475	0	124.917	148.451	88.9812	94.3792	0	85.8165	0	114.47	0	0	174.737	79.4472	135.097	0	95.0724	99.4274	107.96	75.6429	74.2382	79.3243	113.527			73.1636	9.45041
	325pA	112.008	67.6404	74.6617	49.6512	76.2495	0	135.019	0	131.457	167.384	104.18	117.767	0	99.6771	0	125.506	0	0	187.895	93.3162	145.869	35.4523	103.812	117.627	119.235	85.8747	86.478	91.4361	124.647			84.5807	10.0232
	350pA	119.462	78.2719	86.4319	63.8604	86.5508	60.0551	148.397	25.1681	140.901	180.33	117.17	139.144	0	110.634	0	136.523	0	55.641	198.838	107.316	153.813	57.6077	111.777	128.273	133.633	100.218	98.6101	101.592	132.301			99.0523	9.48382
	375pA	122.84	83.6768	96.3087	76.3206	102.433	71.0384	161.542	38.812	143.247	194.495	126.507	158.206	0	120.267	0	147.925	0	64.6623	208.969	117.161	157.376	77.5951	118.654	137.978	142.664	110.151	111.88	113.495	144.092			108.562	9.82624
	400pA	129.532	91.5171	106.124	86.9856	114.23	85.723	172.823	49.2527	146.975	203.514	139.455	172.856	51.4764	130.934	0	156.524	0	77.1247	214.816	132.648	156.734	94.0736	122.224	149.126	151.955	117.859	118.5	123.965	152.159			118.935	9.47644
	425pA	133.603	97.2991	114.164	94.6298	123.643	96.1774	180.202	62.1649	149.84	217.254	149.371	187.512	63.5751	139.609	58.4788	165.541	26.9186	89.1204	225.075	142.729	162.918	109.656	126.742	158.279	162.653	128.873	128.829	133.823	160.841			130.673	8.54505
Group	Cell	'_2024_07_02_105047-compressed.nwb'	'_2024_07_02_113046-compressed.nwb'	'_2024_07_02_115042-compressed.nwb'	'_2024_07_02_125844-compressed.nwb'	'_2024_07_02_132253-compressed.nwb'	'_2024_07_02_140026-compressed.nwb'	'_2024_07_02_142148-compressed.nwb'	'_2024_07_03_162809-compressed.nwb'	'_2024_07_04_114607-compressed.nwb'	'_2024_07_04_121326-compressed.nwb'	'_2024_07_04_132728-compressed.nwb'	'_2024_07_04_140244-compressed.nwb'	'_2024_07_04_141619-compressed.nwb'	'_2024_07_04_143938-compressed.nwb'	'_2024_07_04_145503-compressed.nwb'	'_2024_07_04_154109-compressed.nwb'	'_2024_07_09_161437-compressed.nwb'	'_2024_07_10_103450-compressed.nwb'	'_2024_07_10_105750-compressed.nwb'	'_2024_07_10_111952-compressed.nwb'	'_2024_07_10_121201-compressed.nwb'	'_2024_07_10_123444-compressed.nwb'	'_2024_07_10_125240-compressed.nwb'	'_2024_07_10_134146-compressed.nwb'	'_2024_07_10_140309-compressed.nwb'	'_2024_07_15_144007-compressed.nwb'	'_2024_07_16_110721-compressed.nwb'	'_2024_07_16_121400-compressed.nwb'	'_2024_07_16_122922-compressed.nwb'	'_2024_07_16_143021-compressed.nwb'		Average	SEM
APP Parv-Cre tdTomato	0pA	0	0	0	0	0	0	0	0	0	0	0	0	0	0	0	0	0	0	0	0	0	0	0	0	0	0	0	0	0	0		0	0
	25pA	0	0	0	0	0	0	0	0	0	0	0	0	0	0	0	0	0	0	0	0	0	0	0	0	0	0	0	0	0	0		0	0
	50pA	0	0	0	0	0	0	0	0	0	0	0	0	0	0	0	0	0	0	0	0	0	0	0	0	0	0	0	0	0	0		0	0
	75pA	0	0	0	0	0	0	0	0	0	0	0	0	0	0	0	0	0	0	0	0	0	0	0	0	0	0	0	0	0	0		0	0
	100pA	0	0	0	0	0	0	0	0	0	0	0	0	0	0	0	28.628	0	0	0	0	0	0	0	0	0	0	21.9765	0	0	0		1.68681	1.18281
	125pA	0	0	0	0	0	0	0	0	0	0	0	0	0	0	0	58.0658	0	0	0	0	0	0	0	0	0	0	42.3658	0	0	18.9743		3.98019	2.40957
	150pA	0	0	0	0	0	0	0	0	0	0	0	0	0	0	0	75.9675	0	0	0	0	0	0	0	0	0	0	59.1305	0	0	41.7064		5.89348	3.38436
	175pA	0	0	0	0	20.3328	0	0	0	0	0	0	0	0	0	65.6027	92.9479	0	0	0	58.5404	0	0	0	0	42.584	0	74.6693	0	0	56.4593		13.7045	4.99719
	200pA	28.7484	0	0	0	48.5943	0	0	0	0	0	0	0	0	0	83.0473	106.556	0	0	0	79.9786	0	0	32.8792	0	62.0337	0	90.9482	0	1.85028	70.3344		20.1657	6.23182
	225pA	74.0135	2.97247	0	0	63.7831	0	0	0	0	0	30.705	0	0	45.0205	101.069	116.098	0	0	10.2052	99.4685	0	0	53.8249	40.5054	75.0482	0	104.135	0	14.4078	82.7295		30.4662	7.30586
	250pA	85.1718	22.6792	39.869	0	82.0866	0	0	0	0	0	92.1489	0	0	61.8365	115.725	128.741	0	0	25.515	118.974	34.6403	90.7215	67.1866	62.233	71.8888	0	116.492	44.5752	48.4973	94.9595		46.7981	8.12221
	275pA	104.841	41.9858	57.7156	0	98.6482	0	32.1596	0	3.12168	52.7993	120.529	0	53.1993	78.405	129.865	139.688	0	0	37.5984	132.399	53.7939	109.282	79.5007	76.1378	89.4198	0	122.495	56.6535	56.9688	101.869		60.9692	8.55973
	300pA	115.299	56.5951	73.6511	45.2375	112.272	0	48.1784	0	32.0361	72.2082	148.323	0	65.8741	90.8922	142.651	150.043	72.7475	0	51.8615	148.397	76.1858	125.093	92.6255	89.6007	102.054	0	138.999	71.3711	69.5447	109.797		76.7179	8.69753
	325pA	125.344	71.1571	86.2211	60.6682	126.804	0	61.9965	0	50.1188	90.767	170.398	0	79.9253	101.974	152.389	157.111	89.9009	0	64.2622	161.755	91.6116	143.296	102.554	101.85	111.707	30.1799	146.867	89.444	92.6821	119.289		89.3425	9.02117
	350pA	134.524	84.176	96.2139	71.482	141.659	13.3089	75.2918	0	62.9414	106.207	186.93	0	91.7686	113.314	164.704	164.514	105.425	43.2916	76.648	172.944	104.505	156.758	111.629	112.237	123.897	58.0439	154.14	105.883	98.7566	124.991		101.873	8.8506
	375pA	143.844	90.795	105.3	84.1983	154.216	40.6125	87.6453	7.66518	75.9749	121.964	202.785	0	103.98	123.824	176.111	169.729	117.814	57.8413	90.6496	181.487	117.88	173.138	119.986	121.255	135.912	74.6821	157.324	120.239	111.744	135.436		113.468	8.78957
	400pA	150.015	99.2645	111.353	91.5676	166.855	61.8224	97.4145	42.4114	88.4488	136.05	219.412	0	113.323	133.214	183.639	176.734	130.105	74.9971	100.377	190.304	126.938	187.01	128.102	130.263	151.007	95.7834	164.961	132.683	125.24	142.656		125.065	8.51056
	425pA	154.714	105.654	120.693	101.321	175.576	73.5979	109.426	60.7535	96.3331	153.24	230.262	97.8199	122.616	141.815	196.28	180.188	138.532	91.9945	111.257	198.322	139.949	196.469	135.887	139.159	181.089	102.527	172.597	144.63	133.112	147.083		138.43	7.36503
Panel h
Group	Cell	_2021_05_09_124453	_2021_05_09_134930	_2021_05_09_141334	_2021_05_09_145246	_2021_05_09_151003	_2021_05_09_153147	_2021_05_09_155432	_2021_05_09_165335	_2021_05_02_174157	_2021_05_06_110222	_2021_05_06_110222_cell2	_2021_05_06_122104	_2021_05_06_124644	_2021_05_06_132322	_2021_05_06_145701	_2021_04_17_180947	_2021_04_15_173341							Average	SEM
Parv Cre tdtomato	0pA	0	0	0	0	0	0	0	0	0	0	0	0	0	0	0	0	0							0	0
	25pA	0	0	0	0	0	0	0	0	0	0	0	0	0	0	0	0	0							0	0
	50pA	0	0	0	0	0	0	8.08132	0	0	0	0	0	0	0	0	0	0							0.475372	0.475372
	75pA	0	0	7.97093	6.82259	0	0	13.9307	0	0	7.98891	0	0	0	0	0	0	9.0532							2.69214	1.09598
	100pA	0	0	11.7298	9.77668	0	7.00626	19.3967	0	0	12.2815	0	17.3393	0	0	0	0	13.7065							5.36687	1.72374
	125pA	0	0	14.9215	12.8069	0	8.92325	22.7381	0	0	15.7012	0	18.7476	0	0	0	3.72856	16.4352							6.70603	2.01176
	150pA	0	0	17.4389	15.5997	0	11.3949	25.2553	0	0	19.1912	30.9519	22.6938	0	0	4.43369	6.87633	19.3368							10.1866	2.59615
	175pA	8.12111	0	19.5307	17.6759	0	13.3135	26.796	0	6.27709	21.6404	24.3401	25.1344	0	3.98505	8.39587	8.49912	21.592							12.0766	2.37364
	200pA	11.1767	7.59215	21.393	19.6359	2.18579	14.8722	28.3521	0	10.0043	23.301	25.2898	27.6098	0	8.26824	12.6802	9.47948	23.88							14.4542	2.29935
	225pA	13.9647	10.1472	22.7777	21.3837	6.86095	16.5513	28.7357	0	12.9156	25.0258	26.9507	28.0381	4.21763	12.2374	15.6142	10.5878	24.9365							16.5262	2.12542
	250pA	16.4133	13.6513	23.7702	23.4547	9.93152	17.7389	29.3037	4.38609	21.1401	26.1602	28.9673	28.7936	7.39159	16.299	18.0782	11.7833	26.1035							19.0216	1.8962
Group	Cell	_2021_05_01_184003	_2021_05_02_124058	_2021_05_02_134239	_2021_05_02_143536	_2021_05_02_150400	_2021_05_02_153343	_2021_05_02_161635	_2021_05_02_164701	_2021_04_29_163045	_2021_05_01_120051	_2021_05_01_123337	_2021_05_01_131902	_2021_05_01_155341	_2021_05_01_165345	_2021_05_01_173623	_2021_05_01_180913	_2021_04_29_141552	_2021_04_29_160918	_2021_04_26_122248	_2021_04_25_124040	2021_04_14_16037_cell9			Average	SEM
APP Parv-Cre tdTomato	0pA	0	0	0	0	0	0	0	0	0	0	0	0	0	0	0	0	0	0	0	0	0			0	0
	25pA	0	3.02115	0	0	0	0	0	0	0	0	0	0	0	0	0	0	0	0	0	0	0			0.143864	0.143864
	50pA	0	7.72656	4.97486	4.15632	0	0	0	0	0	0	0	7.37521	0	0	0	0	0	6.49173	0	8.87001	0			1.88546	0.693993
	75pA	2.14823	10.7955	7.80699	8.59867	3.03582	0	0	0	0	0	4.77646	10.2304	1.48038	0	0	5.03632	2.78242	9.36852	0	14.0773	4.05067			4.00894	0.967174
	100pA	8.82242	13.3036	10.0778	12.1023	6.57555	0	6.07207	3.41603	0	0	8.24065	13.3275	6.36116	0	0	8.89066	6.51035	11.6376	0	18.6059	8.02609			6.76046	1.18352
	125pA	13.0904	15.4328	12.1015	15.1219	9.41111	2.26603	10.481	6.12608	0	0	11.4154	15.9053	12.6528	0	0	12.1229	9.32497	14.3169	7.74593	21.93	11.1754			9.55336	1.34273
	150pA	14.8371	17.5282	13.827	18.338	11.3419	4.34423	13.6563	8.07041	0	0	14.0546	18.5818	16.47	0	0	15.4517	12.5825	16.5017	11.9949	24.8681	13.9985			11.7356	1.54573
	175pA	16.5927	19.2708	14.8032	21.1941	13.578	6.47816	16.4819	9.86571	0	0	16.5383	20.6273	18.3245	0	7.56468	17.9293	15.4721	18.7918	14.8957	26.5657	16.4979			13.8796	1.59657
	200pA	18.4436	20.8008	15.5163	22.2913	15.6006	8.10262	19.1147	11.4115	5.15183	0	18.7188	23.1374	21.9474	3.62183	11.6287	20.7144	17.7899	20.0882	16.6423	28.1447	18.9661			16.0873	1.54343
	225pA	20.2403	22.163	16.4488	23.8128	17.5788	9.51421	21.9388	12.7354	9.65712	0	20.224	24.4706	25.4146	7.65166	14.2858	22.8721	19.9503	21.1301	18.6872	29.7143	20.7923			18.0611	1.52205
	250pA	21.0876	23.7951	16.9071	25.7686	18.7286	10.9227	23.5522	13.8595	12.8852	4.43701	22.083	26.0762	27.7624	10.4998	17.1289	23.9724	21.6805	22.5157	20.5226	30.1341	22.8654			19.8659	1.39842
Panel l
Group	Cell	_2021_12_11_114008-compressed.nwb	_2021_12_11_123054-compressed.nwb	_2021_12_11_133729-compressed.nwb	_2021_12_11_143332-compressed.nwb	_2021_12_14_140633-compressed.nwb	_2021_12_14_154910-compressed.nwb	_2021_12_14_170621-compressed.nwb	_2021_12_14_175251-compressed.nwb	_2021_12_14_180738-compressed.nwb	_2021_12_19_123205-compressed.nwb	_2021_12_19_131854-compressed.nwb	_2021_12_19_134336-compressed.nwb	_2021_12_19_153109-compressed.nwb	_2021_12_19_160429-compressed.nwb	_2021_12_19_164835-compressed.nwb	_2021_12_23_154437-compressed.nwb	_2021_12_28_151332-compressed.nwb	_2021_12_28_134654-compressed.nwb	_2021_12_28_125421-compressed.nwb	_2021_12_28_123404-compressed.nwb	_2021_12_27_173740-compressed.nwb	_2022_01_04_141439-compressed.nwb			Average	SEM
Parv Cre tdtomato	0pA	0	0	0	0	0	0	0	0	0	0	0	0	0	0	0	0	0	0	0	0	0	0			0	0
	25pA	0	0	0	0	0	0	0	0	0	0	0	0	0	0	0	0	0	0	0	0	0	0			0	0
	50pA	0	0	0	0	0	0	0	0	0	0	0	0	0	0	0	0	0	0	0	0	0	0			0	0
	75pA	0	0	0	0	0	0	0	0	0	0	0	0	0	0	0	0	0	0	0	0	0	0			0	0
	100pA	0	0	0	0	0	0	0	0	0	0	0	0	0	0	0	0	0	0	0	0	0	0			0	0
	125pA	0	0	0	0	0	0	0	0	0	0	0	0	0	0	0	0	0	0	0	0	0	0			0	0
	150pA	0	0	0	0	0	0	0	0	0	0	0	0	0	0	0	0	0	0	0	0	0	0			0	0
	175pA	0	0	0	0	0	0	0	0	0	0	0	0	0	0	0	0	0	0	0	0	0	0			0	0
	200pA	0	0	0	0	0	0	0	28.2291	24.3595	0	0	0	0	26.5395	0	0	0	0	0	0	0	0			3.59673	1.97934
	225pA	0	0	0	0	26.455	0	48.7144	44.0922	51.1194	0	0	31.8841	43.2309	42.1203	0	0	6.96314	0	0	38.6658	46.097	0			17.2428	4.51487
	250pA	2.52845	38.089	0	26.1462	35.8741	0	62.552	57.2341	68.8461	0	36.9861	48.6641	54.2147	54.4126	39.1537	0	8.01603	0	0	56.3882	48.5018	0			28.9821	5.43403
	275pA	41.0398	43.6666	38.5282	40.1914	48.4522	66.8246	74.9114	69.7323	82.119	20.135	50.6738	61.5728	64.2609	65.7284	57.9754	0	40.8508	0	0	70.967	61.165	0			45.3997	5.58258
	300pA	56.4453	57.3381	51.6849	55.1702	58.8504	77.055	86.7223	80.4787	96.7851	40.362	63.6921	72.3967	72.1766	75.5349	71.4463	0	50.1911	0	0	83.7799	70.3393	0			55.4749	6.35915
	325pA	69.0736	67.7843	63.8581	69.774	68.929	91.2995	95.9697	91.0082	111.32	54.2711	73.7149	84.156	79.2853	84.1413	85.8706	0	63.9349	40.8437	0	93.7076	79.6094	0			66.7523	6.63363
	350pA	79.6476	78.8111	77.2724	82.0332	76.1666	102.599	105.496	101.237	123.996	66.6826	83.4459	93.3679	86.6857	91.3106	95.3951	0	72.2972	43.7635	4.89188	103.817	85.2894	71.2808			78.4313	6.30804
	375pA	88.8007	86.9799	87.7538	92.4455	82.6296	113.1	112.144	109.433	133.591	79.0133	91.5593	103.161	92.5166	99.6752	105.039	53.6392	79.1593	57.9142	59.522	111.803	92.7485	76.9547			91.3446	4.16423
	400pA	96.5486	96.5213	97.8549	102.033	90.3242	122.626	122.821	115.716	145.887	86.4421	100.599	110.13	98.4056	106.434	113.56	63.6167	84.5786	69.0627	65.6732	119.397	98.5574	92.3341			99.9601	4.20275
	425pA	104.95	101.642	104.646	112.478	96.0581	131.628	130.011	125.155	156.37	94.9723	105.147	117.362	104.266	111.585	121.947	76.4857	90.8567	79.2575	73.1224	126.166	103.504	108.008			107.983	4.17864
Group	Cell	_2021_12_15_122748-compressed.nwb	_2021_12_15_124738-compressed.nwb	_2021_12_15_140931-compressed.nwb	_2021_12_15_171340-compressed.nwb	_2021_12_16_124341-compressed.nwb	_2021_12_16_131129-compressed.nwb	_2021_12_16_154239-compressed.nwb	_2021_12_16_162340-compressed.nwb	_2021_12_20_122856-compressed.nwb	_2021_12_20_125905-compressed.nwb	_2021_12_21_144120-compressed.nwb	_2022_01_03_133258-compressed.nwb	_2022_01_03_153846-compressed.nwb	_2022_01_03_173037-compressed.nwb	_2021_12_30_163810-compressed.nwb										Average	SEM
APP Parv-Cre tdTomato	0pA	0	0	0	0	0	0	0	0	0	0	0	0	0	0	0										0	0
	25pA	0	0	0	0	0	0	0	0	0	0	0	0	0	0	0										0	0
	50pA	0	0	0	0	0	0	0	0	0	0	0	0	0	0	0										0	0
	75pA	0	0	0	0	0	0	0	0	0	0	0	0	0	0	0										0	0
	100pA	0	0	0	0	0	0	0	0	0	0	0	0	0	0	0										0	0
	125pA	0	25.2535	0	0	0	0	0	0	0	0	0	0	0	0	0										1.68357	1.68357
	150pA	0	53.2274	0	0	0	0	0	0	0	20.4332	0	0	0	0	0										4.91071	3.70903
	175pA	0	73.6651	33.5497	0	1.67673	0	0	0	0	37.9074	0	0	0	0	0										9.78659	5.58708
	200pA	0	89.2235	47.7896	0	35.4102	0	20.4082	0	0	54.7051	27.677	0	0	0	0										18.3476	7.11277
	225pA	0	103.73	59.9937	37.0907	57.8796	30.2989	44.5244	40.0828	0	67.9925	50.4711	81.9067	0	0	0										38.2647	8.59352
	250pA	0	114.33	71.8013	65.109	75.7024	42.4641	55.6023	54.9707	0	77.9912	64.1077	97.1464	0	0	14.8442										48.9379	9.76868
	275pA	0	124.908	82.0828	83.6753	90.4944	55.5253	64.399	67.9831	41.766	89.8777	77.4236	115.431	40.8003	43.1886	43.3404										68.0597	8.29514
	300pA	1.88608	132.747	92.9751	96.3726	102.657	67.4016	72.5248	78.8087	69.2647	95.0598	88.0864	131.274	56.8924	56.1154	60.0567										80.1415	8.33471
	325pA	27.8197	140.66	103.086	106.683	113.361	79.8684	80.7107	87.8315	87.814	103.41	97.0355	146.975	69.8674	66.6022	78.0048										92.6486	7.58867
	350pA	46.9088	146.811	112.487	113.406	121.369	89.1454	89.2972	96.1546	101.111	108.906	105.029	158.201	77.9938	76.0404	90.2519										102.208	7.11233
	375pA	59.9341	153.138	122.59	121.568	128.157	99.4319	93.2739	103.963	111.13	114.631	112.16	169.686	87.2366	83.1444	105.5										111.036	6.98659
	400pA	70.6247	155.332	131.622	126.634	137.532	108.015	98.9311	112.957	118.85	118.81	119.659	180.552	96.2453	91.2671	114.476										118.767	6.85801
	425pA	80.4101	157.555	141.474	131.544	143.35	115.609	102.433	119.312	126.214	121.675	127.773	189.826	104.458	99.5523	124.271										125.697	6.76625
Panel p
Group	Cell	_2021_12_11_120454-compressed.nwb	_2021_12_14_150749-compressed.nwb	_2021_12_12_170021-compressed.nwb	_2021_12_23_124122-compressed.nwb	_2021_12_23_122401-compressed.nwb	_2021_12_21_172623-compressed.nwb	_2021_12_27_170703-compressed.nwb	_2021_12_27_164842-compressed.nwb	_2021_12_27_162942-compressed.nwb	_2021_12_27_161459-compressed.nwb	_2021_12_27_132901-compressed.nwb	_2021_12_27_130459-compressed.nwb	_2021_12_23_164723-compressed.nwb	_2021_12_28_172601-compressed.nwb	_2021_12_28_160408-compressed.nwb	_2021_12_28_142056-compressed.nwb	_2021_12_28_132203-compressed.nwb	_2022_01_04_161610-compressed.nwb	_2022_01_04_115708-compressed.nwb	_2022_02_17_131429-compressed.nwb	_2022_02_18_164104-compressed.nwb	_2022_02_21_113207-compressed.nwb	_2022_02_21_124243-compressed.nwb	_2022_02_21_125702-compressed.nwb	_2022_02_21_142209-compressed.nwb	_2022_02_21_143748-compressed.nwb	_2022_02_21_152546-compressed.nwb	_2022_02_21_153808-compressed.nwb	_2022_02_23_125909-compressed.nwb	_2022_02_23_141207-compressed.nwb	_2022_02_23_142727-compressed.nwb	_2022_02_23_153016-compressed.nwb	_2022_02_23_154938-compressed.nwb	_2022_02_25_155313-compressed.nwb	_2022_02_26_130840-compressed.nwb	_2022_02_26_135949-compressed.nwb	_2022_02_26_161101-compressed.nwb					Average	SEM
WT control	0pA	0	0	0	0	0	0	0	0	0	0	0	0	0	0	0	0	0	0	0	0	0	0	0	0	0	0	0	0	0	0	0	0	0	0	0	0	0					0	0
	25pA	0	0	0	0	0	0	0	0	0	0	0	0	0	0	0	0	0	0	0	0	0	0	0	0	0	0	0	0	0	0	0	0	0	0	0	0	0					0	0
	50pA	12.1184	0	0	0	0	0	0	0	0	0	0	0	0	0	0	7.59332	0	0	0	0	4.26712	3.18269	0	0	0	3.53607	9.6432	0	0	0	0	0	0	8.1577	4.12775	0	0					1.42233	0.510462
	75pA	22.1771	0	3.59608	0	0	8.51188	0	0	0	10.8839	0	0	0	0	0	8.96057	0	0	5.56187	6.76227	9.22413	8.07324	0	0	0	10.4046	15.3441	2.6448	0	6.69314	0	0	0	10.1915	9.3736	8.35117	0					3.96632	0.89952
	100pA	28.2448	0	10.0109	0	0	13.2448	0	0	0	12.5726	0	0	0	0	0	12.1549	0	0	11.5225	12.6	13.8778	11.1987	0	2.87853	0	14.3788	18.0374	10.585	0	12.6365	0	0	0	13.3597	13.6706	12.2439	6.14862					6.19908	1.20437
	125pA	33.6774	1.46327	14.8982	0	0	17.4822	0	6.84576	4.77751	18.2996	0	4.69683	0	7.11859	2.74756	14.8449	0	0	15.6488	15.8514	18.0512	13.6555	0	6.5738	0	17.2026	19.6557	15.6852	0	17.0439	0	0	2.75406	15.4756	17.5469	15.1637	10.9849					8.86878	1.40647
	150pA	43.6482	6.39441	17.2557	5.70569	1.05352	19.7316	0	10.5966	8.35596	22.2165	0	8.59519	3.99921	10.9443	7.76637	17.6754	0	7.07214	20.6459	18.624	21.6128	16.2788	0	10.1684	0	19.7101	21.4291	18.8493	9.62215	21.5812	0	4.88044	6.69569	18.1682	21.037	17.5857	13.8193					12.2086	1.54305
	175pA	44.1804	10.1308	19.2232	10.5159	4.38609	21.817	3.18168	13.9084	10.9221	25.336	0	12.3089	7.41972	14.0992	11.7229	19.4573	0	15.226	24.5503	20.8066	23.9674	18.1568	0	12.9753	0	21.9969	21.6945	21.762	11.78	25.3254	6.02054	8.61542	10.9603	19.9204	24.2273	19.7213	16.5775					14.9431	1.52072
	200pA	49.5189	13.0108	20.4112	14.014	8.6979	22.783	7.9279	16.2234	13.3041	27.0738	2.4684	15.5633	10.3322	16.3099	15.4475	21.6693	1.37174	18.48	28.3542	22.2401	25.6518	20.0631	5.44179	14.7493	0	21.5285	22.1631	25.4301	13.7604	28.9311	9.11771	12.2868	14.0033	20.9943	26.3907	20.27	18.8127					17.4269	1.51747
	225pA	57.0108	15.6807	21.6953	17.8876	12.6377	23.4754	10.2454	18.6086	14.9096	29.4207	6.98073	18.0434	12.6093	18.1207	18.2237	22.5824	6.82832	21.8169	31.6623	23.1051	27.5195	21.8492	8.91572	17.2711	3.41064	21.5147	22.852	27.5707	16.3598	31.3014	11.2651	15.2346	16.9103	21.9997	29.3629	21.7064	20.5888					19.9237	1.52925
	250pA	59.7546	17.9859	22.3898	20.7445	13.7665	23.8573	12.6205	20.2527	16.3958	31.1136	11.156	20.932	13.9321	20.2846	20.6166	24.08	9.26129	24.7259	34.9015	23.8618	28.418	23.0641	11.1671	18.5485	7.31893	21.1818	23.453	30.3384	18.0044	33.549	13.7624	17.9412	19.4469	23.3902	30.8707	21.8705	20.6633					21.7736	1.50892
Group	Cell	_2021_12_12_155854-compressed.nwb	_2021_12_11_164137-compressed.nwb	_2021_12_15_154248-compressed.nwb	_2021_12_20_165622-compressed.nwb	_2021_12_20_164216-compressed.nwb	_2021_12_20_132720-compressed.nwb	_2021_12_19_172233-compressed.nwb	_2021_12_21_162309-compressed.nwb	_2021_12_21_154341-compressed.nwb	_2021_12_21_152630-compressed.nwb	_2021_12_21_151020-compressed.nwb	_2021_12_21_140337-compressed.nwb	_2021_12_21_132215-compressed.nwb	_2021_12_21_130628-compressed.nwb	_2021_12_30_151902-compressed.nwb	_2021_12_30_134427-compressed.nwb	_2021_12_30_130631-compressed.nwb	_2022_01_03_170456-compressed.nwb	_2022_01_03_160046-compressed.nwb	_2022_01_03_140711-compressed.nwb	_2022_01_03_130051-compressed.nwb	_2022_01_05_142030-compressed.nwb	_2022_01_05_150624	_2022_02_18_125317-compressed.nwb	_2022_02_18_140415-compressed.nwb	_2022_02_18_142641-compressed.nwb	_2022_02_18_151630-compressed.nwb	_2022_02_18_154246-compressed.nwb	_2022_02_22_114442-compressed.nwb	_2022_02_22_165718-compressed.nwb	_2022_02_27_115549-compressed.nwb	_2022_02_27_120849-compressed.nwb	_2022_02_27_125027-compressed.nwb	_2022_02_25_120720-compressed.nwb	_2022_02_25_123957-compressed.nwb	_2022_02_25_134756-compressed.nwb	_2022_02_25_140105-compressed.nwb	_2022_02_25_142100-compressed.nwb	_2022_02_25_151302-compressed.nwb			Average	SEM
APP/PS1	0pA	0	0	0	0	0	0	0	0	0	0	0	0	0	0	0	0	0	0	0	0	0	0	0	0	0	0	0	0	0	0	0	0	0	0	0	0	0	0	0			0	0
	25pA	0	0	0	0	0	0	0	0	0	0	0	0	0	0	0	0	0	0	0	0	0	0	0	0	0	0	0	0	0	0	10.5661	0	0	0	0	0	0	0	0			0.270926	0.469258
	50pA	0	0	0	0	0	0	0	0	0	0	0	0	0	0	1.76429	0	11.4507	0	0	0	0	0	0	0	10.8956	10.8755	0	0	0	0	17.9778	0	0	0	0	0	0	0	0			1.35805	1.12255
	75pA	6.90709	0	10.3458	0	0	0	0	0	6.10922	5.48763	0	0	1.57431	0	5.71926	0	20.9048	11.1602	9.17453	0	0	0	0	0	15.2601	12.5637	4.21142	0	0	0	23.6325	0	0	7.4063	4.75885	8.39364	0	0	6.86548			4.11474	1.68635
	100pA	10.8373	0	15.3831	0	2.21533	2.00884	10.2425	0	9.78944	9.02877	0	1.38812	8.22183	3.39261	8.5031	0	28.3545	18.8805	18.6604	15.3374	0	3.98773	0	4.61403	19.2148	16.5201	8.11914	0	0	4.88713	27.8618	9.46106	0	12.5052	9.89701	14.5056	5.16167	0	11.1936			7.95314	2.1705
	125pA	15.0021	3.35796	19.9809	0	8.40568	6.14507	15.5855	0	12.9741	12.6337	0	4.54105	12.5848	7.0019	11.2671	4.44637	33.7538	25.6065	26.1268	13.7464	8.80663	8.27379	0	8.76913	22.6462	19.4873	10.9581	4.35228	0	8.32306	31.2063	10.2087	0	16.7953	13.2755	20.7597	10.9161	5.54173	14.2648			11.4806	2.40625
	150pA	18.3241	8.90531	23.0347	0	13.2868	8.87836	21.2334	2.8112	16.3914	15.0529	2.7888	7.4696	15.7213	10.9437	13.9475	8.40292	39.5239	31.829	31.3798	16.7326	13.0249	13.1306	0	11.4814	25.6208	21.6682	13.7167	8.83654	0	11.9587	34.1497	13.6117	3.82926	20.6559	17.1878	25.4911	13.0916	8.52152	16.2022			14.8419	2.60533
	175pA	22.545	12.9384	25.3756	3.21048	16.3987	11.8818	23.4601	9.40142	19.2908	17.3816	8.24876	10.4742	18.079	14.2124	16.3131	11.4705	43.8054	36.2355	36.5056	18.2721	13.0341	15.6231	3.87899	14.8035	26.9765	22.9733	16.3593	11.8921	0	13.5856	35.7425	15.9475	7.85045	23.3467	21.1413	28.7684	15.5859	11.2422	17.5942			17.7396	2.61261
	200pA	25.3984	16.5555	26.6465	8.12729	19.4299	14.1024	26.4571	18.1109	21.4328	19.4873	12.519	12.3966	20.7374	17.0093	19.0161	14.4074	46.7772	40.8837	40.4407	19.6954	16.0475	18.2682	6.70504	18.1412	26.6924	23.6543	18.3716	14.1888	3.53357	16.4562	36.0757	17.1747	10.8014	26.2953	24.1511	31.6051	17.9516	13.3729	18.9195			20.4625	2.54355
	225pA	27.218	19.1993	27.4566	10.2949	21.5464	16.7528	28.6679	21.3846	23.4478	21.0927	17.5804	13.5871	22.2069	19.3178	21.1302	16.8029	50.8046	42.6048	43.2079	20.9008	18.6438	21.2832	10.5287	20.2807	26.9666	24.3675	20.1987	16.2938	8.10575	17.8541	35.1745	18.6735	13.1155	29.2378	27.0276	33.4614	19.611	14.9347	18.6818			22.555	2.48794
	250pA	30.2075	21.2142	29.1395	11.7409	23.3615	18.24	28.8993	23.9506	24.8853	22.489	20.2626	15.2187	24.1401	21.5913	22.3318	19.2449	52.995	44.8958	45.4423	22.9908	20.1397	22.4691	12.6771	22.0947	26.9547	24.0458	21.2535	18.2698	11.2223	20.5061	33.6716	19.0432	15.2279	30.8131	28.9043	35.2764	21.2022	16.654	18.6157			24.1611	2.46441
