# Supplementary material for: Progressive remote memory decline coincides with parvalbumin interneuron hyperexcitability and enhanced inhibition of cortical engram cells in a mouse model of Alzheimer’s disease
Source: eLife. 2025 Nov 21;14:RP106866. doi: 10.7554/eLife.106866 (PMC12638044; doi:10.7554/eLife.106866)
Supplement: Figure 3—figure supplement 2—source data 1. [file elife-106866-fig3-figsupp2-data1.xlsx]

## Sheet: Sheet1
sFig 2 APP/PS1 mice show remote memory impairment at 20, but not 16, weeks of age
Panel b				Panel c
group	Animal	Freezing (%)		group	Animal	Freezing (%)
WT	T1	59.6613		WT	T23	50.8329
	T2	54.6918			T24	33.4814
	T3	47.3348			T25	62.6874
	T4	75.1805			T26	70.6552
	T5	46.3631			T27	93.1982
	T6	74.1039			T28	25.1805
	T7	17.3237			T29	65.5747
	T8	58.1899			T30	45.0583
	T9	37.4514			T31	81.0938
	T10	33.7035			T32	93.4203
average		53.5227		average		62.1183
SEM		7.45081		SEM		7.44899
group	Animal	Freezing (%)		group	Animal	Freezing (%)
APP/PS1	T11	21.266		APP/PS1	T33	36.5908
	T12	97.3071			T34	30.4831
	T13	60.6052			T35	25.236
	T14	3.77568			T36	53.7757
	T15	49.2227			T37	48.1122
	T16	84.3611			T38	1.61111
	T17	3.52582			T39	23.9311
	T18	19			T40	50.1666
	T19	99.6668			T41	50.9439
	T20	1.86008			T42	63.548
	T21	0
	T22	18.0455
average		38.2197		average		38.4399
SEM		11.097		SEM		5.83187
