# Supplementary material for: Progressive remote memory decline coincides with parvalbumin interneuron hyperexcitability and enhanced inhibition of cortical engram cells in a mouse model of Alzheimer’s disease
Source: eLife. 2025 Nov 21;14:RP106866. doi: 10.7554/eLife.106866 (PMC12638044; doi:10.7554/eLife.106866)
Supplement: Figure 3—figure supplement 3—source data 1. [file elife-106866-fig3-figsupp3-data1.xlsx]

## Sheet: Sheet1
sFig. 5: Size and reactivation of the mPFC engram ensemble, as well as PV interneuron (re)activation, are unaffected in APP/PS1 mice.
Panel a-d
		Panel a			Panel b			Panel c			Panel d
group	Animal	Fos+ of mCherry + (%)	Fos+ of mCherry - (%)		mCherry of PV+ (%)	mCherry of PV- (%)		Fos+ of MC+PV- (%)	Fos+ of MC-PV- (%)		Fos+ of MC+PV+	Fos+ of MC-PV+
WT	T3	18.9	12.6		5.6338	3.60991		1.493	13.03		25	1.493
	T4	20.9	13.2		14.1935	7.87448		3.008	14.05		13.636	3.008
	T5	16.4	12.7		33.6406	5.08475		6.944	13.01		21.918	6.944
	T6	12.8	10.8		14.2105	6.97774		4.908	11.29		18.519	4.908
	T7	11.3	10.1		27.027	6.49931		2.646	10.64		2.857	2.646
	T8	8.8	8.5		30.814	5.20105		3.361	8.75		15.094	3.361
	T9	16.8	16.2		23	4.96614		8.442	16.64		17.391	8.442
	T10	14	9.6		2.7027	8.30131		1.85	10.29		33.33	1.85
average		14.9875	11.7125		18.9028	6.06434		4.0815	12.2125		18.4681	4.0815
SEM		1.4217	0.869408		4.06327	0.570702		0.879357	0.879246		3.14826	0.879357
		Panel a			Panel b			Panel c			Panel d
group	Animal	Fos+ of mCherry + (%)	Fos+ of mCherry - (%)		mCherry of PV+ (%)	mCherry of PV- (%)		Fos+ of MC+PV- (%)	Fos+ of MC-PV- (%)		Fos+ of MC+PV+	Fos+ of MC-PV+
APP/PS1	T11	26.7	14.9		7.64706	20		4.4872	15.7071		26.6667	4.4872
	T12	14	10.8		5.38348	9.09091		2.7397	11.3799		20.8333	2.7397
	T13	15.8	8.1		5.36913	10.0719		1.9231	8.4989		21.4286	1.9231
	T14	16.3	16		5.20446	10.8844		3.5714	16.6667		18.75	3.5714
	T15	11.5	11.2		4.6073	9.70588		2.5907	11.592		9.0909	2.5907
	T16	16.2	17		3.34076	15.5689		5	17.4018		15.3846	5
	T17	12	9.9		4.05003	13.2979		3.6765	10.2243		6	3.6765
	T18	8.4	5.3		4.27402	15.0538		0	5.5785		2.8571	0
	T19	13	10.7		3.96907	18.6957		2.5974	11.0097		11.6279	2.5974
	T20	8.5	4.5		5.48349	12.6761		1.0753	4.6512		22.2222	1.0753
	T21	11	11.3		5.13465	10.9589		4.1958	11.7228		15.625	4.1958
average		13.9455	10.8818		4.95122	13.2731		2.8961	11.3121		15.4988	2.8961
SEM		1.52699	1.20859		0.343212	1.10773		0.452957	1.24956		2.23653	0.452957
Panel l-r
		Panel o			Panel p			Panel q			Panel r
group	Animal	Fos+ of mCherry + (%)	Fos+ of mCherry - (%)		mCherry of PV+ (%)	mCherry of PV- (%)		Fos+ of MC+PV- (%)	Fos+ of MC-PV- (%)		Fos+ of MC+PV+	Fos+ of MC-PV+
WT	T23	29.1	15.8		15.16	9.91		4.286	16.196		13.514	4.286
	T24	21.74	9.04		18.12	6.01		2.041	9.428		4	2.041
	T25	23.53	13.75		21.18	10.71		0	15.159		11.111	0
	T26	26.78	13.33		27.87	5.36		3.008	13.918		11.765	3.008
	T27	9.59	5.09		21.92	8.98		0.685	5.461		10.417	0.685
	T28	9.57	5.08		21.74	6.92		2.083	5.316		16	2.083
	T29	10.36	9.11		9.39	16.9		2.439	9.282		6.897	2.439
	T30	14.43	7.5		16.49	11.36		1	7.994		9.375	1
	T31	15.56	8.62		19.26	13.86		0.676	9.03		6.061	0.676
	T32	12.83	12		7.96	18.09		12.308	11.982		11.111	12.308
average		17.349	9.932		17.909	10.81		2.8526	10.3766		10.0251	2.8526
SEM		2.32431	1.15916		1.89643	1.38136		1.12502	1.20746		1.1335	1.12502
		Panel o			Panel p			Panel q			Panel r
group	Animal	Fos+ of mCherry + (%)	Fos+ of mCherry - (%)		mCherry of PV+ (%)	mCherry of PV- (%)		Fos+ of MC+PV- (%)	Fos+ of MC-PV- (%)		Fos+ of MC+PV+	Fos+ of MC-PV+
APP/PS1	T34	17.42	14.3		28.65	5.82		9.929	14.601		15.686	9.929
	T35	15.85	10.03		9.76	9.64		0	10.68		25	0
	T36	18.89	12.67		13.06	16.46		3.947	13.034		8.511	3.947
	T37	10.87	5.21		27.17	6.24		0	5.738		4	0
	T38	12	7.86		12.25	19.16		6.383	7.899		8.163	6.383
	T39	12.63	7.37		18.18	20.22		0	7.941		2.778	0
	T40	16.93	11.8		24.92	12.33		1.282	12.743		17.949	1.282
	T41	8.27	4.38		23.31	6.98		1.408	4.532		3.226	1.408
	T42	12.5	8.66		22.69	6.79		11.667	8.421		6.122	11.667
average		13.9289	9.14222		19.9989	11.5156		3.84622	9.50989		10.1594	3.84622
SEM		1.16861	1.1184		2.31248	1.92212		1.49773	1.15114		2.56841	1.49773
