# Supplementary material for: Progressive remote memory decline coincides with parvalbumin interneuron hyperexcitability and enhanced inhibition of cortical engram cells in a mouse model of Alzheimer’s disease
Source: eLife. 2025 Nov 21;14:RP106866. doi: 10.7554/eLife.106866 (PMC12638044; doi:10.7554/eLife.106866)
Supplement: Figure 3—figure supplement 4—source data 1. [file elife-106866-fig3-figsupp4-data1.xlsx]

## Sheet: Sheet1
sFig. 6: Increased reactivation of engram cells in 20- vs. 16-week-old WT and APP/PS1 mice.
		Panel a				Panel b
		Fos+mCherry+ (% of chance)						PV+mCherry+ (% of chance)
group	Animal	12-16w	Animal	16-20w		group	Animal	12-16w	Animal	16-20w
WT	T3	46.63	T23	69.29		WT	T3	14.2772	T23	230.63
	T4	53	T24	119.35			T4	137.935	T24	197.22
	T5	25.07	T25	57.75			T5	167.807	T25	97.15
	T6	17.07	T26	87.79			T6	142.539	T26	300.46
	T7	10.22	T27	72.52			T7	153.99	T27	139.85
	T8	4.12	T28	75.78			T8	191.547	T28	154.22
	T9	3.17	T29	11.26			T9	165.465	T29	163.59
	T10	43.25	T30	73.2			T10	-23.6757	T30	102.44
			T31	61.54					T31	173.55
			T32	5.73					T32	32.04
average		25.3162		63.421		average		118.736		159.115
SEM		7.04321		10.6313		SEM		27.7951		23.6568
group	Animal	12-16w	Animal	16-20w		group	Animal	12-16w	Animal	16-20w
APP/PS1	T11	74.44	T34	19.83		APP/PS1	T11	158.596	T34	252.18
	T12	22.67	T35	49.73			T12	36.1762	T35	50.78
	T13	82.73	T36	38.27			T13	75.4054	T36	140.09
	T14	2.89	T37	92.03			T14	77.2832	T37	157.6
	T15	2.52	T38	39.5			T15	89.6083	T38	184.81
	T16	-4.32	T39	50.16			T16	240.705	T39	93.23
	T17	17.82	T40	35.16			T17	153.375	T40	136.32
	T18	46.46	T41	75.78			T18	150.42	T41	264.25
	T19	19.42	T42	39.38			T19	220.942	T42	165.09
	T20	83.06					T20	123.447
	T21	-2.88					T21	85.362
average		31.3464		48.8711		average		128.302		160.483
SEM		10.3944		7.37002		SEM		19.1892		22.7775
		Panel a				Panel b
		Fos+PV+ (% of chance)						Fos+PV+mCherry+ (% of chance)
group	Animal	12-16w	Animal	16-20w		group	Animal	12-16w	Animal	16-20w
WT	T3	-78.2	T23	-56.5		WT	T3	121.097	T23	159.95
	T4	-66.95	T24	-75.39			T4	137.42	T24	19.96
	T5	-8.9	T25	-82.43			T5	346.305	T25	46.87
	T6	-37.61	T26	-61.88			T6	309.583	T26	230.42
	T7	-73.58	T27	-44.36			T7	-29.066	T27	349.51
	T8	-17.88	T28	-8.88			T8	417.979	T28	647.48*
	T9	-35.46	T29	-53.96			T9	183.799	T29	95.29
	T10	-72.35	T30	-63.64			T10	160.314	T30	127.74
			T31	-70.59					T31	72.07
			T32	-0.73					T32	20.88
average		-48.8662		-51.836		average		205.929		147.106
SEM		9.64886		8.57769		SEM		50.9022		42.9138
group	Animal	12-16w	Animal	16-20w		group	Animal	12-16w	Animal	16-20w
APP/PS1	T11	-57.92	T34	-21.16		APP/PS1	T11	351.09	T34	280.1
	T12	-36.83	T35	-65.66			T12	148.323	T35	256
	T13	-51.08	T36	-58.34			T13	333.938	T36	49.58
	T14	-55.98	T37	-85.64			T14	107.776	T37	82.04
	T15	-68.36	T38	-15.23			T15	54.052	T38	170.28
	T16	-51.83	T39	-87.35			T16	210.211	T39	-36.17
	T17	-57.66	T40	-45.42			T17	49.66	T40	238.56
	T18	-83.45	T41	-58.33			T18	24.943	T41	149.73
	T19	-46.59	T42	16.86			T19	241.675	T42	80.96
	T20	-36.29					T20	975.654*
	T21	-44.29					T21	156.676
average		-53.6618		-46.6967		average		167.834		141.231
SEM		4.12951		11.4765		SEM		36.494		35.3264
