# Supplementary material for: Progressive remote memory decline coincides with parvalbumin interneuron hyperexcitability and enhanced inhibition of cortical engram cells in a mouse model of Alzheimer’s disease
Source: eLife. 2025 Nov 21;14:RP106866. doi: 10.7554/eLife.106866 (PMC12638044; doi:10.7554/eLife.106866)
Supplement: Figure 3—source data 1. [file elife-106866-fig3-data1.xlsx]

## Sheet: Sheet1
Fig 3 Size and reactivation of the mPFC engram ensemble, as well as PV interneuron (re)activation, are unaffected in APP/PS1 mice
Panel d-j
				Panel d	Panel e	Panel f		Panel g		Panel h		Panel i		Panel j
group	Animal		Nissl	PV (% of Nissl)	mCherry (% of Nissl)	Fos (% of Nissl)		Fos+mCherry+ (% of chance)		PV+mCherry+ (% of chance)		Fos+PV+ (% of chance)		Fos+PV+mCherry+ (%of chance)
WT	T3		385.4	3.68	4.9	12.9		46.63		14.2772		-78.2		121.097
	T4		368.8	8.41	6	13.7		53		137.935		-66.95		137.42
	T5		435.57	7.12	12.6	13.2		25.07		167.807		-8.9		346.305
	T6		421	7.52	5.9	11		17.07		142.539		-37.61		309.583
	T7		452.43	8.18	10.6	10.2		10.22		153.99		-73.58		-29.066
	T8		410	6.99	10.6	8.5		4.12		191.547		-17.88		417.979
	T9		471.57	6.06	8.7	16.3		3.17		165.465		-35.46		183.799
	T10		353	7.86	3.5	9.8		43.25		-23.6757		-72.35		160.314
average			412.221	6.9775	7.85	11.95		25.3162		118.736		-48.8662		205.929
SEM			14.564	0.539625	1.14377	0.895824		7.04321		27.7951		9.64886		50.9022
				Panel d	Panel e	Panel f		Panel g		Panel h		Panel i		Panel j
group	Animal		Nissl	PV (% of Nissl)	mCherry (% of Nissl)	Fos (% of Nissl)		Fos+mCherry+ (% of chance)		PV+mCherry+ (% of chance)		Fos+PV+ (% of chance)		Fos+PV+mCherry+ (%of chance)
APP/PS1	T11		552.75	7.7	3.4	15.3		74.44		158.596		-57.92		351.09
	T12		363.25	6.7	18.2	11.4		22.67		36.1762		-36.83		148.323
	T13		411	5.7	6.8	8.7		82.73		75.4054		-51.08		333.938
	T14		382.33	6.2	12.7	16		2.89		77.2832		-55.98		107.776
	T15		490.56	5.1	7.7	11.2		2.52		89.6083		-68.36		54.052
	T16		470.5	4.6	8.9	16.9		-4.32		240.705		-51.83		210.211
	T17		506.29	5.2	10.6	10.2		17.82		153.375		-57.66		49.66
	T18		501.43	6	13.2	5.7		46.46		150.42		-83.45		24.943
	T19		515	5.8	11.2	10.9		19.42		220.942		-46.59		241.675
	T20		449.5	5.7	3.9	4.6		83.06		123.447		-36.29		975.654*
	T21		422.86	5.9	9.9	11.3		-2.88		85.362		-44.29		156.676
average			460.497	5.87273	9.68182	11.1091		31.3464		128.302		-53.6618		167.834
SEM			18.0434	0.250124	1.28974	1.1811		10.3944		19.1892		4.12951		36.494
Panel l-r
				Panel l	Panel m	Panel n		Panel o		Panel p		Panel q		Panel r
group	Animal		Nissl	PV (% of Nissl)	mCherry (% of Nissl)	Fos (% of Nissl)		Fos+mCherry+ (% of chance)		PV+mCherry+ (% of chance)		Fos+PV+ (% of chance)		Fos+PV+mCherry+ (%of chance)
WT	T23		583.3	4.586	10.459	17.188		69.29		230.63		-56.5		159.95
	T24		504.5	6.095	6.838	9.911		119.35		197.22		-75.39		19.96
	T25		355.3	10.741	11.961	14.916		57.75		97.15		-82.43		46.87
	T26		440.7	6.959	6.921	14.259		87.79		300.46		-61.88		230.42
	T27		424.6	9.138	10.316	5.558		72.52		139.85		-44.36		349.51
	T28		353.8	8.551	8.127	5.442		75.78		154.22		-8.88		647.48*
	T29		491.5	3.561	15.717	9.308		11.26		163.59		-53.96		95.29
	T30		405	8.148	11.975	8.333		73.2		102.44		-63.64		127.74
	T31		501.1	7.041	14.652	9.635		61.54		173.55		-70.59		72.07
	T32		344	6.032	16.424	12.137		5.73		32.04		-0.73		20.88
average			440.38	7.0852	11.339	10.6687		63.421		159.115		-51.836		124.743
SEM			25.025	0.680119	1.09903	1.23816		10.6313		23.6568		8.57769		36.2111
				Panel l	Panel m	Panel n		Panel o		Panel p		Panel q		Panel r
group	Animal		Nissl	PV (% of Nissl)	mCherry (% of Nissl)	Fos (% of Nissl)		Fos+mCherry+ (% of chance)		PV+mCherry+ (% of chance)		Fos+PV+ (% of chance)		Fos+PV+mCherry+ (%of chance)
APP/PS1	T34		472	8.136	7.542	14.534		19.83		252.18		-21.16		280.1
	T35		283.3	6.471	9.647	10.588		49.73		50.78		-65.66		256
	T36		377	5.438	15.915	13.66		38.27		140.09		-58.34		49.58
	T37		291.5	10.549	7.89	5.66		92.03		157.6		-85.64		82.04
	T38		446.4	4.301	17.921	8.602		39.5		184.81		-15.23		170.28
	T39		249.8	9.409	19.82	8.408		50.16		93.23		-87.35		-36.17
	T40		317	10.545	14.105	12.528		35.16		136.32		-45.42		238.56
	T41		398.5	6.399	8.344	4.705		75.78		264.25		-58.33		149.73
	T42		446	8.558	8.072	8.969		39.38		165.09		16.86		80.96
average			364.611	7.75622	12.1396	9.73933		48.8711		160.483		-46.6967		141.231
SEM			27.2726	0.744444	1.61112	1.13347		7.37002		22.7775		11.4765		35.3264
blue	statistical outlier
