# Supplementary material for: Progressive remote memory decline coincides with parvalbumin interneuron hyperexcitability and enhanced inhibition of cortical engram cells in a mouse model of Alzheimer’s disease
Source: eLife. 2025 Nov 21;14:RP106866. doi: 10.7554/eLife.106866 (PMC12638044; doi:10.7554/eLife.106866)
Supplement: Figure 4—source data 1. [file elife-106866-fig4-data1.xlsx]

## Sheet: Sheet1
Fig. 4: Perisomatic PV labelling is increased on engram cells in 20-week-old APP/PS1 mice
Panel c
group	Animal		mCherry+PV-	mCherry-PV-
WT	T3		143.261	133.109
	T4		114.89	114.198
	T5		108.935	93.4277
	T6		51.9234	48.0708
	T7		118.468	109.132
	T8		115.247	122.863
	T9		128.126	120.342
	T10		74.7024	64.3781
average			106.944	100.69
SEM			10.4397	10.6256
group	Animal		mCherry+PV-	mCherry-PV-
APP/PS1	T11		106.515	135.674
	T12		133.232	130.993
	T13		108.263	108.066
	T14		81.7332	74.1334
	T15		121.217	114.486
	T16		99.7983	99.0064
	T17		83.9936	78.635
	T18		115.625	111.275
	T19		73.0428	72.3313
	T20		146.65	146.757
	T21		73.4437	72.256
average			103.956	103.965
SEM			7.3456	8.15214
Panel f
group	Animal		Fos+ of mCherry + (%)	Fos+ of mCherry - (%)
WT	T23		132.602	131.811
	T24		81.0673	77.5668
	T25		124.772	114.223
	T26		122.998	115.957
	T27		108.765	98.0482
	T28		113.5	105.352
	T29		137.509	141.057
	T30		152.948	142.295
	T31		115.609	113.367
	T32		123.626	123.077
average			121.34	116.275
SEM			6.03823	6.27292
group	Animal		Fos+ of mCherry + (%)	Fos+ of mCherry - (%)
APP/PS1	T34		87.8411	79.5101
	T35		138.915	122.178
	T36		142.241	134.508
	T37		188.037	165.856
	T38		130.597	124.152
	T39		132.413	118.737
	T40		129.038	125.242
	T41		135.048	140.468
	T42		109.461	102.046
average			132.621	123.633
SEM			8.95021	8.01578
