# Supplementary material for: Progressive remote memory decline coincides with parvalbumin interneuron hyperexcitability and enhanced inhibition of cortical engram cells in a mouse model of Alzheimer’s disease
Source: eLife. 2025 Nov 21;14:RP106866. doi: 10.7554/eLife.106866 (PMC12638044; doi:10.7554/eLife.106866)
Supplement: Figure 5—source data 1. [file elife-106866-fig5-data1.xlsx]

## Sheet: Sheet1
Fig. 5: Engram cells of 20-week-old APP/PS1 mice receive increased inhibitory input.
Panel e+f
Group	Cell	mCh+/-	Freq	Amp	Cell	mCh+/-		Amp
WT	ABF1_2024_07_19_0005_cell1_IPSC.abf	+	8.4	20.25	ABF1_2024_07_19_0007_cell2_IPSC.abf	-	11.4833	22.34
	ABF1_24719002_cell3_IPSC.abf	+	1.96667	33.31	ABF1_24719004_cell4_IPSC.abf	-	1.81667	22.37
	ABF1_24719007_cell5_IPSC.abf	+	8.43333	27.18	ABF1_24719013_cell6_IPSC.abf	-	5.45	17.98
	ABF1_24723004_cell1_IPSC.abf	+	3.61667	17.23	ABF1_24723007_cell2_IPSC.abf	-	5.53333	18.57
	ABF1_24723009_cell3_IPSC.abf	+	1.88333	19.79	ABF1_24723015_cell4_IPSC.abf	-	2.46667	15.7
	ABF1_24723018_cell5_IPSC.abf	+	2	16.97	ABF1_24723020_cell6_IPSC.abf	-	2.4	17.3
	ABF1_24725003_cell1_IPSC.abf	+	7.68333	19.51	ABF1_24725006_cell2_IPSC.abf	-	3.71667	19.01
	ABF1_24725008_cell3_IPSC.abf	+	3.33333	17.64	ABF1_24725013_cell4_IPSC.abf	-	2.01667	30.65
	ABF1_24725016_cell5_IPSC.abf	+	4.13333	18.99	ABF1_24725020_cell6_IPSC.abf	-	2.05	22.11
	ABF1_24725023_cell7_IPSC.abf	+	1.43333	24.15	ABF1_24725032_cell8_IPSC.abf	-	4.7	25.62
	ABF1_24725036_cell9_IPSC.abf	+	2.35	16.47	ABF1_24725040_cell10_IPSC.abf	-	2.55	26.12
	ABF1_24729010_cell1_IPSC.abf	+	0.95	18.36	ABF1_24729013_cell2_IPSC.abf	-	2.28333	15.37
	ABF1_24729022_cell5_IPSC.abf	+	2.65	24.13	ABF1_24729026_cell6_IPSC.abf	-	0.933333	37.52
	ABF1_24729031_cell7_IPSC.abf	+	1.63333	18.15	ABF1_24729033_cell8_IPSC.abf	-	0.816667	17.1
	ABF1_24731001_cell1_IPSC.abf	+	3.3	22.16	ABF1_24731005_cell2_IPSC.abf	-	6.8	37.89
	ABF1_24731008_cell3_IPSC.abf	+	1.71667	28.35	ABF1_24731011_cell4_IPSC.abf	-	5.58333	30.08
	ABF1_24731016_cell5_IPSC.abf	+	7.26667	21.47	ABF1_24731019_cell6_IPSC.abf	-	4.66667	30.85
	ABF1_24731024_cell7_IPSC.abf	+	2.48333	22.32	ABF1_24731029_cell8_IPSC.abf	-	3.2	37.11
	ABF1_24731034_cell9_IPSC.abf	+	1.75	26.12	ABF1_24731038_cell10_IPSC.abf	-	1.05	12.92
	ABF1_24802004_cell1_IPSC.abf	+	5	21.76	ABF1_24802008_cell2_IPSC.abf	-	6.56667	18.69
	ABF1_24802011_cell3_IPSC.abf	+	4.91667	17.53	ABF1_24802015_cell4_IPSC.abf	-	4.4	20.76
	ABF1_24802028_cell7_IPSC.abf	+	1.6	18.39	ABF1_24802035_cell8_IPSC.abf	-	2.23333	16.98
Avg			3.56818	21.3741			3.75985	23.32
SEM			0.507684	0.924637			0.534036	1.62427
Panel g+h
Group	Cell	mCh+/-	Freq	Amp	Cell	mCh+/-		Amp
APP/PS1	ABF1_2024_07_18_0011_cell1_IPSC.abf	+	10.5	28.74	ABF1_2024_07_18_0015_cell2_IPSC.abf	-	3.73333	20.35
	ABF1_2024_07_18_0017_cell3_IPSC.abf	+	2.26667	15.4	ABF1_2024_07_18_0021_cell4_IPSC.abf	-	3.53333	23.68
	ABF1_24722002_cell1_IPSC.abf	+	6.08333	22.56	ABF1_24722004_cell2_IPSC.abf	-	3.6	18.28
	ABF1_24722006_cell3_IPSC.abf	+	5.03333	15.33	ABF1_24722009_cell4_IPSC.abf	-	4.1	30.51
	ABF1_24724001_cell1_IPSC.abf	+	1.98333	15.01	ABF1_24724003_cell2_IPSC.abf	-	2.05	17.12
	ABF1_24724007_cell3_IPSC.abf	+	4.23333	23.6	ABF1_24724009_cell4_IPSC.abf	-	3.01667	21.29
	ABF1_24724012_cell5_IPSC.abf	+	12.65	29.45	ABF1_24724015_cell6_IPSC.abf	-	6.26667	37.93
	ABF1_24724023_cell7_IPSC.abf	+	0.75	20.88	ABF1_24724026_cell8_IPSC.abf	-	1.81667	17.64
	ABF1_24726002_cell1_IPSC.abf	+	5.58333	21.16	ABF1_24726006_cell2_IPSC.abf	-	6.56667	20.03
	ABF1_24726010_cell3_IPSC.abf	+	4.73333	27.17	ABF1_24726013_cell4_IPSC.abf	-	4.38333	25.15
	ABF1_24726019_cell5_IPSC.abf	+	6.5	24.77	ABF1_24726023_cell6_IPSC.abf	-	1.6	28.13
	ABF1_24726028_cell7_IPSC.abf	+	7.51667	69.38	ABF1_24726033_cell8_IPSC.abf	-	4.16667	24.02
	ABF1_24726036_cell9_IPSC.abf	+	3.33333	20.7	ABF1_24726038_cell10_IPSC.abf	-	1.38333	21.26
	ABF1_24730008_cell1_IPSC.abf	+	1.5	17.77	ABF1_24730010_cell2_IPSC.abf	-	0.383333	13.64
	ABF1_24730013_cell3_IPSC.abf	+	3.03333	18.8	ABF1_24730020_cell4_IPSC.abf	-	5.65	22.63
	ABF1_24730025_cell5_IPSC.abf	+	2.5	32.86	ABF1_24730029_cell6_IPSC.abf	-	1.96667	19.48
	ABF1_24730034_cell7_IPSC.abf	+	0.45	11.79	ABF1_24730037_cell8_IPSC.abf	-	1.3	25.14
	ABF1_24730039_cell9_IPSC.abf	+	3.63333	15.22	ABF1_24730044_cell10_IPSC.abf	-	2.38333	17.06
	ABF1_24801002_cell1_IPSC.abf	+	4.56667	17.96	ABF1_24801007_cell2_IPSC.abf	-	1.06667	26
	ABF1_24801013_cell3_IPSC.abf	+	2.38333	23.52	ABF1_24801016_cell4_IPSC.abf	-	2.48333	22.41
	ABF1_24805002_cell1_IPSC.abf	+	6.26667	40.21	ABF1_24805008_cell2_IPSC.abf	-	3.46667	98.33
	ABF1_24805011_cell3_IPSC.abf	+	3.61667	17.86	ABF1_24805015_cell4_IPSC.abf	-	0.383333	30.6
	ABF1_24805019_cell5_IPSC.abf	+	0.766667	37.11	ABF1_24805027_cell6_IPSC.abf	-	1.86667	17.78
Avg			4.34275	24.663			2.92029	26.02
SEM			0.629352	2.53532			0.362117	3.47729
