# Supplementary material for: Progressive remote memory decline coincides with parvalbumin interneuron hyperexcitability and enhanced inhibition of cortical engram cells in a mouse model of Alzheimer’s disease
Source: eLife. 2025 Nov 21;14:RP106866. doi: 10.7554/eLife.106866 (PMC12638044; doi:10.7554/eLife.106866)
Supplement: Source data 1. [file elife-106866-data1.xlsx]

## Sheet: Sheet1
Table 1A PV cell properties at 16 weeks
Cell	PV-Cre-tdTomato	APP/PS1-PV-Cre-tdTomato	'_2024_07_02_144512-compressed.nwb'	'_2024_07_03_112747-compressed.nwb'	'_2024_07_03_114658-compressed.nwb'	'_2024_07_03_130543-compressed.nwb'	'_2024_07_03_132905-compressed.nwb'	'_2024_07_03_143406-compressed.nwb'	'_2024_07_03_151922-compressed.nwb'	'_2024_07_03_155326-compressed.nwb'	'_2024_07_04_161608-compressed.nwb'	'_2024_07_09_114449-compressed.nwb'	'_2024_07_09_121213-compressed.nwb'	'_2024_07_09_132054-compressed.nwb'	'_2024_07_09_135139-compressed.nwb'	'_2024_07_09_142026-compressed.nwb'	'_2024_07_09_143349-compressed.nwb'	'_2024_07_09_144632-compressed.nwb'	'_2024_07_09_153304-compressed.nwb'	'_2024_07_09_154705-compressed.nwb'	'_2024_07_11_142832-compressed.nwb'	'_2024_07_15_131146-compressed.nwb'	'_2024_07_15_133559-compressed.nwb'	'_2024_07_15_135431-compressed.nwb'	'_2024_07_16_144922-compressed.nwb'	'_2024_07_17_130021-compressed.nwb'	'_2024_07_17_133423-compressed.nwb'	'_2024_07_17_141051-compressed.nwb'	'_2024_07_17_143021-compressed.nwb'	'_2024_07_17_152708-compressed.nwb'	'_2024_07_17_154451-compressed.nwb'		'_2024_07_02_105047-compressed.nwb'	'_2024_07_02_113046-compressed.nwb'	'_2024_07_02_115042-compressed.nwb'	'_2024_07_02_125844-compressed.nwb'	'_2024_07_02_132253-compressed.nwb'	'_2024_07_02_140026-compressed.nwb'	'_2024_07_02_142148-compressed.nwb'	'_2024_07_03_162809-compressed.nwb'	'_2024_07_04_114607-compressed.nwb'	'_2024_07_04_121326-compressed.nwb'	'_2024_07_04_132728-compressed.nwb'	'_2024_07_04_140244-compressed.nwb'	'_2024_07_04_141619-compressed.nwb'	'_2024_07_04_143938-compressed.nwb'	'_2024_07_04_145503-compressed.nwb'	'_2024_07_04_154109-compressed.nwb'	'_2024_07_09_161437-compressed.nwb'
Properties	(mean ± SEM)	(mean ± SEM)	PV-Cre-tdTomato	PV-Cre-tdTomato	PV-Cre-tdTomato	PV-Cre-tdTomato	PV-Cre-tdTomato	PV-Cre-tdTomato	PV-Cre-tdTomato	PV-Cre-tdTomato	PV-Cre-tdTomato	PV-Cre-tdTomato	PV-Cre-tdTomato	PV-Cre-tdTomato	PV-Cre-tdTomato	PV-Cre-tdTomato	PV-Cre-tdTomato	PV-Cre-tdTomato	PV-Cre-tdTomato	PV-Cre-tdTomato	PV-Cre-tdTomato	PV-Cre-tdTomato	PV-Cre-tdTomato	PV-Cre-tdTomato	PV-Cre-tdTomato	PV-Cre-tdTomato	PV-Cre-tdTomato	PV-Cre-tdTomato	PV-Cre-tdTomato	PV-Cre-tdTomato	PV-Cre-tdTomato		APP/PS1-PV-Cre-tdTomato	APP/PS1-PV-Cre-tdTomato	APP/PS1-PV-Cre-tdTomato	APP/PS1-PV-Cre-tdTomato	APP/PS1-PV-Cre-tdTomato	APP/PS1-PV-Cre-tdTomato	APP/PS1-PV-Cre-tdTomato	APP/PS1-PV-Cre-tdTomato	APP/PS1-PV-Cre-tdTomato	APP/PS1-PV-Cre-tdTomato	APP/PS1-PV-Cre-tdTomato	APP/PS1-PV-Cre-tdTomato	APP/PS1-PV-Cre-tdTomato	APP/PS1-PV-Cre-tdTomato	APP/PS1-PV-Cre-tdTomato	APP/PS1-PV-Cre-tdTomato	APP/PS1-PV-Cre-tdTomato
RMP (mV)	-71.6 ± 0.88	-71.1±1.04	-63.9236	-63.7574	-77.2064	-71.2875	-73.2605	-69.8736	-67.506	-63.8561	-82.282	-65.6106	-75.6069	-67.5835	-74.9492	-73.7983	-72.483	-80.1447	-71.924	-73.6997	-68.9032	-72.9477	-73.4081	-63.2473	-75.7886	-73.4869	-71.9743	-73.2567	-74.3089	-69.1135	-72.2373		-53.171	-72.21	-77.3397	-75.3996	-70.8619	-67.6393	-71.1249	-72.1096	-72.8937	-72.4991	-70.7892	-74.0446	-77.9248	-78	-74	-67.5339	-66.9259
Rheobase (pA)	258.1±16.60	256.3±14.57	43.604	315.28	231.57	317.664	304.352	345.848	235.32	346.76	185.955	214.65	216.065	285.6	379.824	234.475	384.344	140.315	461.436	354.144	167.25	268.28	190.965	303.8	192.865	184.72	170.32	246.04	340.632	249.384	173.34		227.8	243.832	252.248	301.912	175.8	358.264	289.576	389.104	271.8	282.576	240.72	445.092	268.904	235.455	173.435	113.345	376.76
Current threshold (mV)	-30.7±1.17	-32.1±0.71	-40.3467	-28.2444	-31.3353	-26.9949	-32.9466	-30.4804	-21.8981	-21.3391	-42.231	-33.8131	-30.8865	-30.9852	-26.283	-30.5577	-24.6388	-38.4495	-31.0181	-24.7704	-39.0457	-33.3241	-32.6336	-13.1341	-32.1208	-37.0202	-39.0261	-27.4186	-26.5636	-29.6217	-32.2194		-34.2306	-36.0062	-31.3369	-32.6851	-35.1513	-26.6018	-26.7333	-16.87*	-33.3689	-32.0536	-38.367	-33.1716	-33.073	-31.9878	-34.8486	-38.4657	-22.8961
Input resistance (Mohm)	94.1±3.48	93.4±5.44	114.078	89.1873	94.1449	83.9767	63.9436	80.9414	118.68	73.1508	106.287	105.326	99.002	96.7761	72.9994	107.804	67.89	98.0914	56.1534	90.3007	102.644	85.0902	123.335	66.5241	133.655	109.473	92.1214	88.6309	92.6273	105.022	112.458		106.439	88.1761	90.7561	83.016	106.388	88.0749	83.2184	69.3061	79.5252	85.5452	87.6194	61.8192	83.2181	101.784	131.277	179.54	96.7255
Membrane capacitance (pF)	129.7±9.23	99.7±4.45	89.40*	372.13*	173.666	126.385	102.232	115.501	111.686	70.00*	128.896	85.4269	89.3831	84.1978	171.501	104.489	188.147	137.5	96.0322	125.396	114.476	112.882	82.1059	132.166	128.789	226.331	135.979	57.5894	112.088	275.27	154.613		80.2575	89.8683	118.072	75.21*	113.093	139.565	123.372	43.1349	90.9666	81.17	92.2907	103.848	96.0596	133.368	87.6662	92.2632	77.5784
Sag ratio	0.062±0.007	0.063±0.004	0.0830395	0.126867	0.069684	0.0667701	-0.00544217	0.0219608	0.12415	0.224*	0.0581076	0.0775896	0.0582468	0.0768468	0.0808575	0.0943857	0.12963	0.0705177	-0.0348615	0.0516175	0.0450807	0.026593	0.0573536	0.0463819	0.0480437	0.0469252	0.0514346	0.0532071	0.04428	0.102915	0.0557039		0.0720404	0.109262	0.0450346	0.102963	0.0462223	0.0433196	0.0459303	0.0410308	0.0766798	0.0812067	0.0721365	0.0965055	0.0652079	0.0569275	0.108456	0.0676599	0.0529817
Time constant (ms)	5.74±0.39	5.46±0.25	3.14*	9.38214	7.22502	6.45388	3.03092	4.99573	5.83063	2.57*	7.3783	4.15834	4.72941	3.99708	5.10797	5.80853	3.06215	5.55865	3.22486	5.36974	6.44966	7.14899	6.03519	2.84984	7.75356	*13.02	6.91705	2.51532	5.79582	10.1602	8.26732		4.58995	4.70686	5.66325	4.15*	6.15633	4.64048	5.8071	3.41503	3.14104	3.4558	4.97902	3.93326	4.17049	6.91141	6.95195	9.09471	4.52761
AP amplitude (mV)	53.4±1.19	51.9±0.98	50.7914	49.6408	45.0673	57.1039	66.1844	59.1637	57.7228	46.0376	58.9797	60.8924	48.4948	44.4306	47.8705	49.5679	53.5692	57.1201	55.8339	50.6525	65.4603	59.7104	54.1805	58.5653	52.8378	53.0116	54.96	53.2029	51.5495	48.6733	37.0306		51.9599	55.5638	49.4621	55.4219	51.7326	35.8959	52.5341	50.5939	50.5257	60.1137	60.0929	59.2842	51.8103	46.6083	59.3564	59.3859	45.46
AP half-width (msec)	0.38±0.012	0.40±0.010	0.5115	0.552194	0.4808	0.426	0.362242	0.371643	0.319	0.3786	0.37569	0.36025	0.368214	0.324625	0.317733	0.408488	0.309069	0.326182	0.287902	0.36873	0.284722	0.3245	0.374385	0.35752	0.524435	0.376594	0.384409	0.439538	0.394769	0.385722	0.408906		0.511326	0.547571	0.4204	0.443037	0.345417	0.337409	0.384562	0.400519	0.3939	0.351568	0.369583	0.369205	0.404538	0.4255	0.349327	0.3747	0.447448
AHP (mV)	-18.3±0.48	-17.6±0.45	-11.9117	-15.7867	-19.352	-16.3626	-15.7527	-16.3825	-22.6057	-19.6484	-16.7795	-16.8636	-18.0404	-17.3168	-21.7135	-19.1706	-20.3044	-18.8496	-16.5679	-19.8175	-20.844	-21.1015	-23.0432	-19.6073	-15.7493	-16.9419	-18.0869	-17.9041	-18.6342	-20.6831	-13.398		-12.9955	-15.0055	-17.8799	-17.9856	-17.1684	-15.8554	-19.6864	-17.5665	-20.2852	-17.6748	-14.8903	-12.6306	-18.2009	-16.0713	-19.3349	-20.0847	-15.9237
AHP time to peak (ms)	1.28±0.070	1.31±0.045	2.29	1.72323	2.294	1.27652	1.05563	1.14286	0.993878	1.344	1.24	1.0425	1.1837	1.03812	1.08	1.32293	0.977241	1.03619	0.8725	1.25784	0.751111	0.965556	1.18615	1.0448	1.983	1.16839	1.47524	1.39333	1.19846	1.31667	1.49094		1.55907	1.80095	1.755	1.41556	1.12278	1.17454	1.19875	1.3763	1.291	1.08865	1.06833	1.05727	1.38308	1.65	1.04694	1.27	1.38364
dv/dtmin (mV/ms)	-182.1±8.14	-167.6±5.57	-121.255	-118.218	-121.862	-166.271	-223.501	-193.008	-239.203	-159.48	-189.74	-214.251	-166.292	-173.404	-196.638	-158.037	-222.071	-220.687	-242.088	-169.568	-300.511	-230.544	-191.352	-202.491	-118.448	-174.945	-172.857	-152.145	-167.953	-161.124	-111.831		-124.61	-127.616	-147.314	-156.071	-184.417	-132.652	-173.456	-159.662	-164.659	-210.048	-207.982	-194.194	-159.396	-131.667	-218.87	-194.007	-135.432
dv/dtmax (mV/ms)	284.5±9.61	265.80±6.33	225.041	202.916	208.672	275.498	363.899	325.477	337.582	238.946	310.701	305.757	269.168	252.991	283.119	260.174	322.363	328.527	354.571	283.946	400.346	348.282	278.744	329.616	235.395	285.101	285.554	244.468	259.771	246.344	188.826		225.628	220.862	251.552	260.199	295.715	212.616	278.989	272.498	253.607	326.159	288.407	310.329	266.222	234.836	313.357	314.028	204.682
Interspike interval (ms)	16.4±0.71	17.0±0.83	22.82	20.31	24.98	14.09	15.06	15.29	14.29	22.67	16.04	13.15	17.38	12.91	13.32	17.12	16.76	17.99	48.74*	16.76	10.47	13.12	14.33	17.47	16.43	23.68	19.97	11.75	13.24	13.95	13.7		14.55	26.67	26.25	16.8	14.18	17.75	18.24	15.15	20.42	14.51	23.51	9.03	18.29	18.84	16.11	18.34	11.08
Adaptation ratio	1.08±0.031	1.09±0.063	1.36592	0.73987	0.844488	0.756188	1.0148	0.942029	0.893588	1.27291	0.759574	1.06515	0.981395	1.2	1.0626	0.860697	1.25652	1.09409	8.350*	0.937086	0.958716	0.983137	0.832321	1.10292	1.0774	1.13453	1.02706	0.984925	0.974125	1.08036	1.30314		1.02072	2.028	2.426	0.950904	0.902796	1.08067	0.825458	1.05539	1.04744	1.1821	3.448*	0.967949	0.895833	1.20027	1.1395	1.03559	0.823009
blue	statistical outlier
blue + bold	unpropper fit
[truncated: 14 more columns]
