# Supplementary material for: Progressive remote memory decline coincides with parvalbumin interneuron hyperexcitability and enhanced inhibition of cortical engram cells in a mouse model of Alzheimer’s disease
Source: eLife. 2025 Nov 21;14:RP106866. doi: 10.7554/eLife.106866 (PMC12638044; doi:10.7554/eLife.106866)
Supplement: Source data 2. [file elife-106866-data2.xlsx]

## Sheet: Sheet1
Table 1B PYR cell properties at 16 weeks
Cell	PV-Cre-tdTomato	APP/PS1-PV-Cre-tdTomato	_2021_05_09_124453	_2021_05_09_134930	_2021_05_09_141334	_2021_05_09_145246	_2021_05_09_151003	_2021_05_09_153147	_2021_05_09_155432	_2021_05_09_165335	_2021_05_02_174157	_2021_05_06_110222	_2021_05_06_110222_cell2	_2021_05_06_122104	_2021_05_06_124644	_2021_05_06_132322	_2021_05_06_145701	_2021_04_17_180947	_2021_04_15_173341		_2021_05_01_184003	_2021_05_02_124058	_2021_05_02_134239	_2021_05_02_143536	_2021_05_02_150400	_2021_05_02_153343	_2021_05_02_161635	_2021_05_02_164701	_2021_04_29_163045	_2021_05_01_120051	_2021_05_01_123337	_2021_05_01_131902	_2021_05_01_155341	_2021_05_01_165345	_2021_05_01_173623	_2021_05_01_180913	_2021_04_29_141552	_2021_04_29_160918	_2021_04_26_122248	_2021_04_25_124040	2021_04_14_16037_cell9
Properties	(mean ± SEM)	(mean ± SEM)	PV-Cre-tdTomato	PV-Cre-tdTomato	PV-Cre-tdTomato	PV-Cre-tdTomato	PV-Cre-tdTomato	PV-Cre-tdTomato	PV-Cre-tdTomato	PV-Cre-tdTomato	PV-Cre-tdTomato	PV-Cre-tdTomato	PV-Cre-tdTomato	PV-Cre-tdTomato	PV-Cre-tdTomato	PV-Cre-tdTomato	PV-Cre-tdTomato	PV-Cre-tdTomato	PV-Cre-tdTomato		APP/PS1-PV-Cre-tdTomato	APP/PS1-PV-Cre-tdTomato	APP/PS1-PV-Cre-tdTomato	APP/PS1-PV-Cre-tdTomato	APP/PS1-PV-Cre-tdTomato	APP/PS1-PV-Cre-tdTomato	APP/PS1-PV-Cre-tdTomato	APP/PS1-PV-Cre-tdTomato	APP/PS1-PV-Cre-tdTomato	APP/PS1-PV-Cre-tdTomato	APP/PS1-PV-Cre-tdTomato	APP/PS1-PV-Cre-tdTomato	APP/PS1-PV-Cre-tdTomato	APP/PS1-PV-Cre-tdTomato	APP/PS1-PV-Cre-tdTomato	APP/PS1-PV-Cre-tdTomato	APP/PS1-PV-Cre-tdTomato	APP/PS1-PV-Cre-tdTomato	APP/PS1-PV-Cre-tdTomato	APP/PS1-PV-Cre-tdTomato	APP/PS1-PV-Cre-tdTomato
RMP (mV)	-65.3 ± 1.46	-64.1±1.87	-76.1598	-67.6762	-59.916	-74.5157	-59.6201	-67.742	-68.4325	-63.4015	-65.714	-50.2923	-66.9964	-68.9036	-65.2537	-62.8204	-59.4472	-65.8825	-68.0028		-61.262	-76.1465	-69.548	-77.2878	-62.7086	-53.3829	-62.5835	-47.5722	-68.7316	-58.9116	-66.8506	-65.2231	-61.1132	-63.9908	-62.7667	-52.9615	-47.9099	-71.307	-71.2347	-75.8566	-68.3912
Rheobase (pA)	161.7±19.39	110.5±13.66	249.5	212.975	70.02	72.64	248.925	105.33	58.2	303.75	214.25	76.33	168.5	137.5	269.7	202.05	172.025	108.03	78.39		85.33	46.1	66.43	62.59	93.64	97	97.87	140.75	221.25	266.75	81.05	52.15	146.925	212.75	191.275	76.61	81.63	54.49	98.18	56.2	90.89
Current threshold (mV)	-39.5±1.27	-42.1±0.84	-40.68	-32.3	-40.81	-40.35	-27.72	-38.71	-43.51	-31.67	-44.801	-40.99	-45.064	-39.01	-43.62	-43.65	-41.96	-44.15	-32.95		-46.84	-46.81	-45.92	-43.49	-33.79	-37.18	-43.79	-38.81	-44.96	-33.62	-42.69	-42.3	-44.31	-45.4	-41.62	-41.09	-44.12	-45.8	-41.12	-41.96	-38.43
Input resistance (Mohm)	124.4±13.93	141.7±9.54	98.6467	93.1224	145.734	176.643	95.3585	91.2811	179.932	66.5536	69.3156	188.744	90.8113	132.713	56.8204	82.9946	83.6517	215.049	247.011		143.103	152.573	204.789	149.679	149.942	163.358	133.37	117.981	73.3928	86.6771	149.548	188.743	135.737	84.704	105.486	177.037	42.8782	162.437	189.282	207.946	156.372
Membrane capacitance (pF)	158.5±9.04	149.8±8.23	150.008	153.963	151.852	163.208	205.838	222.012	110.078	174.969	191.797	113.948	193.678	122.056	210.109	167.819	139.325	104.7	119.528		132.147	142.587	198.34	129.542	221.343	165.061	116.805	213.433	148.058	135.453	135.12	143.591	81.4528	146.962	107.489	134.732	146.467	148.135	194.263	99.0422	205.676
Sag ratio	0.12±0.017	0.12 ±0.012	0.0541252	0.0587862	0.0762	0.1022	0.0964	0.1193	0.0553263	0.111346	0.203599	0.1476	0.1164	0.084203	0.248164	0.228256	0.265007	0.0633526	0.0497611		0.143724	0.134884	0.0471305	0.0663931	0.14	0.0783	0.0978431	0.127639	0.197307	0.223215	0.1242	0.0967678	0.197002	0.1749	0.175544	0.174151	0.0512	0.0783533	0.0576102	0.0581462	0.0666297
Time constant (ms)	21.7±1.86	26.8±2.32	15.0696	16.1973	25.6788	36.4896	22.7514	29.0805	25.5471	13.3949	13.7934	25.4708	23.265	19.1466	13.0478	15.08	13.4575	24.5743	36.3034		18.9598	31.8735	44.9567	27.6249	43.7103	30.5088	17.6243	30.314	12.8342	13.3534	25.9392	39.3417	10.8464	13.1574	12.0518	29.5302	26.8606	32.3576	38.7557	28.5052	34.555
AP amplitude (mV)	84.8±4.23	79.1±2.09	76.2045	78.731	80.8245	67.0666	77.1334	90.0644	87.5785	84.7155	92.491	82.4575	79.805	79.9859	96.1804	92.7497	99.7227	34.81	41.35		66.7614	94.6936	79.3991	84.0245	85.9782	66.3559	84.0546	86.5564	77.6099	72.8776	85.0083	85.0083	74.1884	93.0451	79.2259	79.7635	71.1001	87.9482	57.2678	66.3823	83.0607
AP half-width (msec)	1.26±0.096	1.50±0.054	1.23525	1.17833	1.1876	1.5962	1.5385	1.226	1.1002	1.19767	0.9334	1.0985	1.13267	1.22325	0.9138	1.05767	1.05475	3.32*	2.53		1.80833	1.426	1.585	1.51267	1.50325	1.87133	1.4195	1.32133	1.18975	1.333	1.51175	1.51175	1.571	1.24367	1.4486	1.4325	1.51929	1.19867	2.0904	1.8492	1.095
AHP (mV)	-13.5±0.78	-13.2±0.86	-11.4677	-14.4243	-15.139	-16.9146	-11.2293	-18.1099	-14.4287	-14.0407	-11.0681	-15.1642	-15.6629	-13.6023	-11.3509	-11.2676	-19.4415	-7.48067	-8.70721		-10.5332	-13.9749	-12.8021	-14.7859	-14.8873	-13.2843	-12.5527	-22.5132	-7.94924	-10.1825	-16.4246	-16.4246	-9.16093	-10.9168	-8.20078	-16.4081	-12.7018	-14.1392	-8.02328	-10.6406	-21.0666
AHP time to peak (ms)	42.6±3.55	45.1±3.47	32.875	29.3333	26.18	65.76	43.025	76.8	27.58	45.2667	37	25.7833	32.2333	48.3667	41.16	54.1333	60.825	37.625	39.62		22.6167	34.66	47.1	53.7667	35.375	37.3333	28	68.3	42.825	53.8333	60.15	60.15	29.22	38.4	37.04	61	44.8286	30.9167	38.7	34.16	88.4333
dv/dtmin (mV/ms)	-58.3±5.18	-49.1±2.55	-58.0371	-58.7496	-58.2015	-40.1821	-43.3223	-58.8592	-64.9095	-56.5574	-91.7413	-67.5729	-66.422	-57.1328	-86.8089	-82.5342	-71.847	-12.1664	-16.7699		-36.5538	-54.913	-42.4178	-48.2269	-47.1857	-33.9781	-53.4332	-56.3378	-73.0804	-57.434	-47.0213	-47.0213	-49.2573	-68.3946	-54.058	-47.0213	-44.0618	-59.3519	-26.5031	-33.1451	-64.5589
dv/dtmax (mV/ms)	258.9±24.10	215.9±12.05	237.738	262.51	261.282	150.929	212.912	303.914	338.95	287.5	322.574	253.193	251.329	273.251	394.783	318.08	419.902	44.3086	68.5923		127.418	304.093	200.361	230.832	245.3	142.489	245.793	244.971	211.678	184.907	241.683	241.683	180.851	291.554	203.54	224.255	176.858	290.347	108.972	151.455	284.87
Interspike interval (ms)	47.6±2.44	52.3±2.03	36.1	43	45.8	47.45	41.55	47.85	57.2	52.4	68.85	54.45	44.3	27.75	54.6	53	52.3	40.2	38.95		62.8	60.3	52.9	48.7	57.45	48.45	59.5	60.7	49.15	44.45	55.8	48.85	49.55	64.8	49.4	45.8	62.95	55.7	27.15	35.65	58.4
Adaptation ratio	0.39±0.046	0.49±0.032	0.280757	0.455882	0.600644	0.335697	0.337931	0.35786	0.594921	0.393498	0.730445	0.700441	0.394382	0.11349	0.382387	0.278215	0.357692	0.0972053	0.281849		0.711004	0.587229	0.508161	0.436061	0.600248	0.396498	0.594012	0.688131	0.415144	0.125259	0.568796	0.566248	0.498663	0.684547	0.366851	0.44484	0.507431	0.488568	0.209877	0.394081	0.569116
blue	statistical outlier
blue + bold	unpropper fit
