# Supplementary material for: Progressive remote memory decline coincides with parvalbumin interneuron hyperexcitability and enhanced inhibition of cortical engram cells in a mouse model of Alzheimer’s disease
Source: eLife. 2025 Nov 21;14:RP106866. doi: 10.7554/eLife.106866 (PMC12638044; doi:10.7554/eLife.106866)
Supplement: Source data 3. [file elife-106866-data3.xlsx]

## Sheet: Sheet1
Table 1C PV cell properties at 20 weeks
Cell	PV-Cre-tdTomato	APP/PS1-PV-Cre-tdTomato	_2021_12_11_114008-compressed.nwb	_2021_12_11_123054-compressed.nwb	_2021_12_11_133729-compressed.nwb	_2021_12_11_143332-compressed.nwb	_2021_12_14_140633-compressed.nwb	_2021_12_14_154910-compressed.nwb	_2021_12_14_170621-compressed.nwb	_2021_12_14_175251-compressed.nwb	_2021_12_14_180738-compressed.nwb	_2021_12_19_123205-compressed.nwb	_2021_12_19_131854-compressed.nwb	_2021_12_19_134336-compressed.nwb	_2021_12_19_153109-compressed.nwb	_2021_12_19_160429-compressed.nwb	_2021_12_19_164835-compressed.nwb	_2021_12_23_154437-compressed.nwb	_2021_12_28_151332-compressed.nwb	_2021_12_28_134654-compressed.nwb	_2021_12_28_125421-compressed.nwb	_2021_12_28_123404-compressed.nwb	_2021_12_27_173740-compressed.nwb	_2022_01_04_141439-compressed.nwb		_2021_12_15_122748-compressed.nwb	_2021_12_15_124738-compressed.nwb	_2021_12_15_140931-compressed.nwb	_2021_12_15_171340-compressed.nwb	_2021_12_16_124341-compressed.nwb	_2021_12_16_131129-compressed.nwb	_2021_12_16_154239-compressed.nwb	_2021_12_16_162340-compressed.nwb	_2021_12_20_122856-compressed.nwb	_2021_12_20_125905-compressed.nwb	_2021_12_21_144120-compressed.nwb	_2022_01_03_133258-compressed.nwb	_2022_01_03_153846-compressed.nwb	_2022_01_03_173037-compressed.nwb	_2021_12_30_163810-compressed.nwb
Properties	(mean ± SEM)	(mean ± SEM)	PV-Cre-tdTomato	PV-Cre-tdTomato	PV-Cre-tdTomato	PV-Cre-tdTomato	PV-Cre-tdTomato	PV-Cre-tdTomato	PV-Cre-tdTomato	PV-Cre-tdTomato	PV-Cre-tdTomato	PV-Cre-tdTomato	PV-Cre-tdTomato	PV-Cre-tdTomato	PV-Cre-tdTomato	PV-Cre-tdTomato	PV-Cre-tdTomato	PV-Cre-tdTomato	PV-Cre-tdTomato	PV-Cre-tdTomato	PV-Cre-tdTomato	PV-Cre-tdTomato	PV-Cre-tdTomato	PV-Cre-tdTomato		APP/PS1-PV-Cre-tdTomato	APP/PS1-PV-Cre-tdTomato	APP/PS1-PV-Cre-tdTomato	APP/PS1-PV-Cre-tdTomato	APP/PS1-PV-Cre-tdTomato	APP/PS1-PV-Cre-tdTomato	APP/PS1-PV-Cre-tdTomato	APP/PS1-PV-Cre-tdTomato	APP/PS1-PV-Cre-tdTomato	APP/PS1-PV-Cre-tdTomato	APP/PS1-PV-Cre-tdTomato	APP/PS1-PV-Cre-tdTomato	APP/PS1-PV-Cre-tdTomato	APP/PS1-PV-Cre-tdTomato	APP/PS1-PV-Cre-tdTomato
RMP (mV)	-70.22±0.65	-71.2±0.75	-72.3544	-74.2616	-73.7355	-67.422	-69.6131	-69.4487	-72.5397	-65.3384	-66.292	-73.5905	-65.6658	-69.0199	-67.8032	-68.7897	-70.2271	-70.0299	-66.0759	-71.8961	-71.4357	-74.7239	-75.2172	-69.3076		-73.1973	-74.7428	-71.8794	-66.421	-74.3127	-69.8078	-66.8171	-71.6836	-76.1078	-73.3456	-70.3667	-69.7565	-68.3754	-72.0582	-68.3754
Rheobase (pA)	307.4±16.18	265.4±19.17	298.125	329.355	337.905	291.42	261.325	356.22	263.025	223.85	243.175	265.2	314.325	253.275	244.075	161.975	312.75	445.32	260.9	408.645	443.25	256	436.5	356.4		397.575	148.95	194.375	178.65	226.55	246.075	259.45	236.6	333.45	190.35	243.375	306.675	354.375	360.495	303.48
Current threshold (mV)	-34.7±0.70	-36.6±1.24	-34.2438	-36.4798	-33.3888	-29.7718	-33.8372	-31.7328	-34.9552	-32.489	-35.8102	-34.5262	-36.0059	-34.3289	-30.8762	-40.9383	-35.7995	-30.0123	-35.7583	-31.0233	-38.8493	-38.4218	-41.9402	-33.1372		-37.3227	-38.3421	-43.0748	-43.7653	-33.5718	-30.7769	-34.2308	-32.2907	-39.6082	-34.3799	-38.7011	-43.9767	-28.3905	-32.3693	-38.2223
Input resistance (Mohm)	83.7±3.16	89.6±4.49	103.269	71.1198	80.3644	81.0221	71.8149	92.202	92.8596	99.0415	92.2019	79.444	72.999	87.4673	117.325	106.539	91.4124	68.0003	86.9317	71.4206	58.9252	72.8674	62.8662	80.89		62.4763	127.846	85.0987	96.8047	81.8105	78.5223	90.8818	94.7009	88.3881	123.901	89.7029	84.8364	88.1246	83.2581	67.0799
Membrane capacitance (pF)	64.8±3.36	68.1±5.67	70.4	81.5459	64.9103	66.2806	44.418	61.5428	71.1841	46.7422	54.4565	59.3187	80.5546	59.3352	55.2973	43.8979	73.8725	163.81*	313.06*	100.988	67.779	787.56*	64.5747	46.85*		90.7966	45.2804	63.2498	58.8004	80.0389	50.8922	57.2988	55.5886	172.61*	50.7724	48.2036	105.148	105.148	87.5121	54.65
Sag ratio	0.10±0.0051	0.10±0.0057	0.112505	0.0822695	0.0794573	0.0913978	0.0902979	0.10018	0.15221	0.0866949	0.0920238	0.147622	0.111463	0.0786363	0.0894843	0.11698	0.0989749	0.10441	0.149289	0.101778	0.0686688	0.13514	0.0988283	0.0840707		0.105003	0.0815916	0.0787151	0.102647	0.125037	0.103955	0.102779	0.0805846	0.0981946	0.124475	0.0597038	0.0928982	0.0928982	0.148781	0.0852091
Time constant (ms)	6.1±0.27	6.2±0.32	6.73514	6.3145	5.38212	5.49661	6.9773	6.07179	7.53956	5.20347	5.42632	5.36804	6.25992	5.34992	7.227	5.00922	5.11081	13.36*	19.13*	9.35	5.27987	44.81*	5.13233	3.37*		5.91394	6.3609	5.62246	6.34484	7.30614	4.37424	5.22981	5.63497	16.01*	6.82568	4.73559	7.49993	7.49993	8.20331	4.85513
AP amplitude (mV)	59.1±1.42	59.1±1.43	56.5313	56.9259	55.2231	59.8159	69.3991	49.7354	58.978	55.3534	50.1632	45.1006	56.9633	55.6445	62.4468	67.2671	58.1637	64.3538	65.0414	58.6053	74.0834	64.0784	59.004	56.576		61.0788	63.055	59.438	54.9842	65.759	62.2785	53.3398	57.2755	48.0772	60.2885	55.0887	66.2743	66.2743	51.8051	61.1262
AP half-width (msec)	0.46±0.011	0.46±0.014	0.474567	0.4226	0.485417	0.400636	0.367294	0.483449	0.411139	0.427286	0.426308	0.542	0.496333	0.465545	0.459031	0.502684	0.466815	0.418955	0.405167	0.569885	0.36575	0.423929	0.5142	0.491444		0.444833	0.4543	0.394154	0.45975	0.426692	0.460955	0.505029	0.462355	0.476364	0.538455	0.437	0.393167	0.393167	0.593882	0.495312
AHP (mV)	-19.2±0.37	-18.6±0.43	-22.8521	-19.1112	-18.5319	-19.1764	-20.0041	-15.2346	-18.2981	-19.424	-15.8366	-17.5647	-17.8552	-18.8087	-22.5892	-19.9718	-18.5602	-20.0239	-19.6472	-18.8705	-20.8391	-19.1986	-19.7886	-20.1131		-16.5562	-16.4247	-17.9738	-18.1646	-19.1715	-18.2749	-17.7226	-18.7026	-16.2867	-21.1016	-20.2555	-21.0885	-21.0885	-17.5301	-18.7183
AHP time to peak (ms)	1.37±0.047	1.39±0.056	1.42333	1.22	1.57917	1.18182	1.05882	1.4551	1.175	1.3	1.36154	1.8	1.46667	1.64091	1.45312	1.47895	1.35926	1.23636	1.06667	1.728	1.05	1.15	3.06*	1.48889		1.33333	1.38	1.21923	1.325	1.16923	1.39545	1.53235	1.49355	1.51	1.67273	1.45	1.03333	1.03333	1.81765	1.45
dv/dtmin (mV/ms)	-158.9±7.45	-157.1±8.32	-147.148	-160.4	-133.667	-177.684	-232.478	-121.121	-172.531	-159.307	-138.788	-100.291	-140.846	-140.871	-159.87	-159.549	-150.15	-183.872	-196.965	-121.172	-245.876	-184.212	-131.069	-138.471		-163.589	-155.829	-179.612	-144.763	-187.63	-159.822	-128.173	-145.159	-120.29	-132.068	-154.547	-217.023	-217.023	-106.249	-144.292
dv/dtmax (mV/ms)	243.7±8.35	239.8±9.04	221.254	234.648	218.407	273.85	302.189	196.602	253.769	238.71	220.387	164.177	231.492	229.878	265.916	241.651	231.576	284.403	287.721	197.927	339.755	273.816	230.57	222.248		266.237	269.076	275.21	206.417	267.28	258.841	201.887	237.611	195.202	223.93	219.599	278.678	278.678	169.595	248.035
Interspike interval (ms)	23.2±1.73	21.9±1.37	24.0333	23.329	26.1261	15.3809	35.4562	15.0417	19.8133	35.78	19.6919	25.169	19.8216	33.2476	23.2484	38.8556	27.9577	17.8951	14.3353	29.472	13.4836	10.8441	27.95	12.669		20.8647	18.4125	28.796	15.2792	28.236	31.6333	22.1515	24.2567	14.608	53.12*	19.9811	23.5828	23.5828	17.6438	17.9317
Adaptation ratio	1.30±0.318	1.04±0.050	0.799107	1.29224	1.06383	1.04848	0.933993	1.00704	1.09375	0.680203	0.898396	1.12207	0.79798	0.906344	1.15942	1.67769	15.37*	0.767956	1.05738	7.59	0.780702	0.732673	1.05576	0.896552		1.0101	0.882022	1.14615	0.89781	0.928814	1.0125	0.677885	1.17544	0.846154	1.2	1.0929	1.37727	1.37727	1.03636	0.90303
blue	statistical outlier
blue + bold	unpropper fit
