# Supplementary material for: Progressive remote memory decline coincides with parvalbumin interneuron hyperexcitability and enhanced inhibition of cortical engram cells in a mouse model of Alzheimer’s disease
Source: eLife. 2025 Nov 21;14:RP106866. doi: 10.7554/eLife.106866 (PMC12638044; doi:10.7554/eLife.106866)
Supplement: Source data 4. [file elife-106866-data4.xlsx]

## Sheet: Sheet1
Table 1D PYR cell properties at 20 weeks
Cell	WT control	APP/PS1	_2021_12_11_120454-compressed.nwb	_2021_12_14_150749-compressed.nwb	_2021_12_12_170021-compressed.nwb	_2021_12_23_124122-compressed.nwb	_2021_12_23_122401-compressed.nwb	_2021_12_21_172623-compressed.nwb	_2021_12_27_170703-compressed.nwb	_2021_12_27_164842-compressed.nwb	_2021_12_27_162942-compressed.nwb	_2021_12_27_161459-compressed.nwb	_2021_12_27_132901-compressed.nwb	_2021_12_27_130459-compressed.nwb	_2021_12_23_164723-compressed.nwb	_2021_12_28_172601-compressed.nwb	_2021_12_28_160408-compressed.nwb	_2021_12_28_142056-compressed.nwb	_2021_12_28_132203-compressed.nwb	_2022_01_04_161610-compressed.nwb	_2022_01_04_115708-compressed.nwb	_2022_02_17_131429-compressed.nwb	_2022_02_18_164104-compressed.nwb	_2022_02_21_113207-compressed.nwb	_2022_02_21_124243-compressed.nwb	_2022_02_21_125702-compressed.nwb	_2022_02_21_142209-compressed.nwb	_2022_02_21_143748-compressed.nwb	_2022_02_21_152546-compressed.nwb	_2022_02_21_153808-compressed.nwb	_2022_02_23_125909-compressed.nwb	_2022_02_23_141207-compressed.nwb	_2022_02_23_142727-compressed.nwb	_2022_02_23_153016-compressed.nwb	_2022_02_23_154938-compressed.nwb	_2022_02_25_155313-compressed.nwb	_2022_02_26_130840-compressed.nwb	_2022_02_26_135949-compressed.nwb	_2022_02_26_161101-compressed.nwb		_2021_12_12_155854-compressed.nwb	_2021_12_11_164137-compressed.nwb	_2021_12_15_154248-compressed.nwb	_2021_12_20_165622-compressed.nwb	_2021_12_20_164216-compressed.nwb	_2021_12_20_132720-compressed.nwb	_2021_12_19_172233-compressed.nwb	_2021_12_21_162309-compressed.nwb	_2021_12_21_154341-compressed.nwb
Properties	(mean ± SEM)	(mean ± SEM)	WT control	WT control	WT control	WT control	WT control	WT control	WT control	WT control	WT control	WT control	WT control	WT control	WT control	WT control	WT control	WT control	WT control	WT control	WT control	WT control	WT control	WT control	WT control	WT control	WT control	WT control	WT control	WT control	WT control	WT control	WT control	WT control	WT control	WT control	WT control	WT control	WT control		APP/PS1	APP/PS1	APP/PS1	APP/PS1	APP/PS1	APP/PS1	APP/PS1	APP/PS1	APP/PS1
RMP (mV)	-67.3±0.95	-65.9±1.09	-77.5169	-69.2843	-68.8712	-74.9293	-66.0511	-65.0975	-61.4051	-77.2545	-72.6181	-70.6451	-60.8461	-73.21	-73.3744	-62.6561	-66.0759	-72.4551	-73.4744	-64.5725	-71.4006	-60.5888	-61.3978	-72.6765	-67.5797	-69.7171	-68.9279	-61.1347	-61.6937	-57.0902	-69.0688	-67.8521	-67.2931	-71.8967	-55.8829	-69.6416	-64.9065	-64.8736	-54.8044		-56.0408	-63.5051	-51.0322	-71.3069	-62.5602	-68.1173	-68.3475	-55.6354	-75.1675
Rheobase (pA)	130.2±8.85	104.3±6.79	78.51	80.76	68.79	87.98	206.125	143.75	155.425	62.29	76.08	131.3	178.3	72.35	174.05	164.675	158.3	69.81	71.35	73.18	87.97	53.68	160.075	117.05	153.875	200.15	61.23	201.4	138.625	143.075	113.175	235.075	136.125	168.4	136.175	159.725	65.98	252.63	181.55		59.58	69.53	40.33	92.72	94.83	108.63	209	138.3	59.98
Current threshold (mV)	-40.4±0.54	-40.8±0.53	-41.7409	-41.1371	-45.3932	-43.1322	-43.6584	-38.5616	-38.3545	-40.5905	-41.0837	-36.6117	-36.7432	-40.0644	-39.6369	-41.8087	-43.5514	-42.4334	-34.8376	-37.379	-37.8606	-41.9116	-38.3143	-40.1557	-44.7922	-47.2255	-36.2427	-36.2427	-36.9661	-36.7688	-39.1129	-46.8732	-43.4534	-43.848	-38.3895	-42.5795	-42.3493	-41.6259	-34.8119		-39.6982	-46.5049	-40.3784	-36.3529	-37.9641	-47.0397	-45.6915	-36.1691	-43.2388
Input resistance (Mohm)	125.6±8.64	136.0±9.63	155.205	133.897	142.446	145.076	52.4799	116.666	70.3686	143.631	163.755	158.099	88.2567	240.437	87.0726	87.0726	79.97	162.176	211.626	199.266	141.526	267.925	93.7809	123.244	96.6745	47.0877	82.8639	106.145	106.934	123.901	52.7433	99.5679	77.0764	181.116	96.0165	92.2017	178.09	69.4471	174.408		266.873	235.569	345.365	164.633	151.522	72.7361	60.7668	125.61	194.268
Membrane capacitance (pF)	'163.3±9.11	167.0±9.19	77.7518	182.889	182.101	196.1	684.30*	223.352	101.401	148.042	184.268	59.1414	198.099	77.7599	274.734	125.09*	149.27*	171.418	90.0764	201.531	166.202	140.44	206.306	198.809	139.791	143.44*	89.8165	228.585	117.983	160.024	161.246	225.671	135.871	222.731	139.37	164.93*	185.481	193.007	146.868		59.6096	104.25	47.7997	133.988	165.291	196.336	217.937	201.767	124.014
Sag ratio	0.14±0.013	0.13±0.009	0.105098	0.0718665	0.109884	0.171586	0.194034	0.180318	0.0701057	0.0577209	0.0764052	NaN	0.138634	0.154833	0.107481	NaN	0.239899	0.0937352	0.307524	0.0913331	0.051595	NaN	0.126295	0.096058	0.206357	NaN	0.101503	0.115528	0.0807859	0.0996127	0.240555	0.258348	0.250981	0.144671	0.0535977	0.215321	0.318285	0.253084	0.0827791		0.124645	0.123085	NaN	0.0949297	0.150482	0.324	0.275425	0.148859	0.111363
Time constant (ms)	23.2±1.40	24.8±1.10	15.3727	26.2229	29.622	33.4563	42.34*	30.3411	11.9303	25.5583	34.8963	11.5343	19.8225	21.1309	21.4831	12.60*	15.22*	35.6422	20.4531	43.5371	27.6869	50.9732	24.2053	29.8705	15.2397	7.94*	20.7238	13.8169	22.2051	28.0084	11.9009	15.3353	19.7075	26.3201	18.3553	31.80*	15.659	26.1119	15.659		18.8758	25.0115	19.2802	22.3659	26.7021	16.9563	16.4078	28.1385	28.0557
AP amplitude (mV)	'84.1±1.75	84.7±1.03	81.7345	87.309	86.042	88.4968	95.5775	89.5118	76.0244	89.1868	73.8213	69.452	85.6699	44.4374	84.5492	97.7922	95.6483	78.3587	81.8443	74.695	82.8881	64.76	86.0732	73.9965	93.7414	102.963	75.9538	87.7524	88.558	73.3197	85.6258	99.2939	95.3014	89.2099	52.5077	90.6781	84.4415	93.9499	72.237		88.7637	71.4132	94.1905	79.7838	72.2757	97.08	82.9625	86.294	85.6363
AP half-width (msec)	1.25±0.035	1.17±0.024	1.09383	0.9884	1.09633	1.27433	1.17733	1.3614	1.50525	1.12229	1.77	1.25737	1.3084	2.01*	1.22575	1.17325	1.1928	1.71	1.26333	1.4052	1.32675	1.05689	1.2564	1.34233	1.1692	1.008	1.17157	1.19833	1.10933	1.30225	1.298	1.123	1.11325	1.215	1.87	1.27633	1.29733	1.03167	0.773167		1.224	0.897556	1.04	1.20417	1.80567	1.10633	1.214	1.053	0.959667
AHP (mV)	-13.0±0.47	-12.9±0.42	-15.093	-16.7831	-16.8357	-16.3698	-10.2812	-16.5463	-13.9093	-14.5623	-12.0076	-20.5475	-12.2652	-9.52935	-14.419	-11.4924	-10.8972	-11.454	-23.48*	-14.2117	-14.3203	-12.309	-10.3646	-11.761	-10.4829	-10.1442	-19.0624	-10.917	-17.1482	-14.1806	-8.00138	-10.8512	-11.5828	-12.8241	-12.2542	-11.717	-9.80986	-11.0868	-12.8899		-9.42315	-11.1544	-11.8129	-16.461	-11.3225	-12.1665	-8.0299	-14.9943	-15.2639
AHP time to peak (ms)	34.7±1.99	34.8±1.38	14.2333	42.56	56.5333	38.1667	29.9333	59.32	18	24.0286	34.1667	19.05	43.54	22.04	28.1	40.85	34.7	47.3667	44.2	29.12	31.775	15.2222	36.32	48.4333	35.24	29.925	21.1857	47.3333	39.5333	37.1	48.9	53.5333	33.975	30.125	22	34.0333	51.5667	28.35	14.5		22.0143	18.1889	26.875	27.4	32.9667	46.1667	36.82	42.7	32.8
dv/dtmin (mV/ms)	-58.4±2.23	-63.1±1.66	-82.9183	-74.3797	-66.4222	-54.3104	-62.9145	-51.9538	-45.9533	-65.906	-37.721	-49.4882	-53.6643	-24.7277	-55.5715	-64.0384	-64.9756	-37.8147	-61.8189	-46.7584	-48.4192	-62.2207	-56.6236	-51.5159	-63.9893	-81.4663	-58.5308	-61.819	-69.1628	-50.4746	-53.4887	-72.8893	-66.8335	-57.2154	-28.8269	-63.9011	-54.8036	-71.5736	-86.6997		-64.3086	-79.0273	-78.7524	-55.2426	-36.3899	-70.4781	-64.7785	-69.7104	-76.232
dv/dtmax (mV/ms)	263.2±11.57	267.4±7.43	254.235	321.72	273.033	315.449	360.936	297.452	196.884	295.05	180.055	202.228	260.43	72.2758	267.582	375.517	337.636	202.884	230.396	213.537	262.73	172.632	251.617	201.679	304.36	354.391	241.169	297.258	285.639	196.719	280.268	352.061	346.252	294.791	97.8251	265.578	253.85	368.993	254.345		250.564	183.557	346.988	267.006	187.649	351.185	238.793	288.158	311.669
Interspike interval (ms)	69.7±1.20	69.0±1.10	67.79	64.1091	73.2222	76.5222	8	74.0111	54.2889	73.3444	69.11	65.26	69.4	59.6727	70.7111	71.8778	78.9111	69.8	73.7	68.53	75.5	43.7437	77.75	65.11	66.79	73.6111	70.31	76.6778	67.49	69.6	63.06	68.02	76.2333	77.9444	67.31	77.6	68.01	79.7444	65.42		64.05	68.8833	63.61	72.7111	69.7778	68.6	61.5455	75.8778	75.2
Adaptation ratio	0.50±0.027	0.44±0.023	0.559091	0.681138	0.651724	0.496696	0.631147	0.384615	0.542208	0.478535	0.211268	0.606897	0.224199	0.665574	0.386697	0.381546	0.357301	0.395031	0.763522	0.519399	0.545566	0.703614	0.317277	0.437666	0.587819	0.921481	0.60281	0.514546	0.570014	0.642953	0.205369	0.423841	0.523227	0.4253	0.507712	0.77136	0.320377	0.446613	0.259978		0.401835	0.567901	0.633731	0.181347	0.158715	0.542857	0.331565	0.450226	0.411765
blue	statistical outlier
blue + bold	unpropper fit
[truncated: 31 more columns]
