# Supplementary material for: Progressive remote memory decline coincides with parvalbumin interneuron hyperexcitability and enhanced inhibition of cortical engram cells in a mouse model of Alzheimer’s disease
Source: eLife. 2025 Nov 21;14:RP106866. doi: 10.7554/eLife.106866 (PMC12638044; doi:10.7554/eLife.106866)
Supplement: Source data 5. [file elife-106866-data5.xlsx]

## Sheet: Sheet1
Table 1E SST cell properties at 20 weeks
Cell	APP/PS1 SST-Cre	SST-Cre	_2022_02_07_152735-compressed.nwb	_2022_02_09_172434-compressed.nwb	_2022_02_15_115052-compressed.nwb	_2022_02_15_132532-compressed.nwb	_2022_02_16_151858-compressed.nwb	_2022_02_17_125107-compressed.nwb		_2022_02_17_162051-compressed.nwb	_2022_02_17_163929-compressed.nwb	_2022_02_22_175346-compressed.nwb	_2022_02_23_122602-compressed.nwb	_2022_02_23_131225-compressed.nwb	_2022_02_23_135104-compressed.nwb	_2022_02_23_151429-compressed.nwb	_2022_02_26_125133-compressed.nwb	_2022_02_26_134130-compressed.nwb	_2022_02_26_150227-compressed.nwb		_2022_02_08_154739-compressed.nwb	_2022_02_09_152858-compressed.nwb	_2022_02_09_162914-compressed.nwb	_2022_02_09_170601-compressed.nwb	_2022_02_16_120227-compressed.nwb	_2022_02_16_124759-compressed.nwb	_2022_02_16_140552-compressed.nwb	_2022_02_16_142616-compressed.nwb	_2022_02_17_171813-compressed.nwb	_2022_02_21_155547-compressed.nwb	_2022_02_22_132149-compressed.nwb	_2022_02_22_141845-compressed.nwb	_2022_02_23_173035-compressed.nwb	_2022_02_26_162834-compressed.nwb	_2022_02_27_113842-compressed.nwb	_2022_02_27_133038-compressed.nwb
Properties	(mean ± SEM)	(mean ± SEM)	SST-Cre	SST-Cre	SST-Cre	SST-Cre	SST-Cre	SST-Cre	SST-Cre	SST-Cre	SST-Cre	SST-Cre	SST-Cre	SST-Cre	SST-Cre	SST-Cre	SST-Cre	SST-Cre	SST-Cre		APP/PS1-SST-Cre	APP/PS1-SST-Cre	APP/PS1-SST-Cre	APP/PS1-SST-Cre	APP/PS1-SST-Cre	APP/PS1-SST-Cre	APP/PS1-SST-Cre	APP/PS1-SST-Cre	APP/PS1-SST-Cre	APP/PS1-SST-Cre	APP/PS1-SST-Cre	APP/PS1-SST-Cre	APP/PS1-SST-Cre	APP/PS1-SST-Cre	APP/PS1-SST-Cre	APP/PS1-SST-Cre
RMP (mV)	-61.2±2.14	-58.7±1.22	-71.4221	-58.9671	-57.8819	-73.2051	-71.9661	-70.3548	-61.6081	-49.7047	-58.2212	-51.2465	-49.7339	-69.562	-67.2274	-50.7204	-67.2412	-63.098	-48.86		-50.5706	-37.8123	-64.5098	-65.562	-72.4588	-61.6734	-58.8126	-53.5843	-49.867	-50.5131	-72.4457	-41.01	-62.6381	-59.2435	-68.9438	-70.1933
Rheobase (pA)	76.2±6.50	75.4±8.20	101.58	83.99	42.57	78.12	96.79	216.93*	142.575	82.19	73.95	81.23	57.18	52.2	69.76	56.7	39.46	98.79	62.33		70.97	139.8	86.55	91.27	42.76	85.84	68.23	83.6	38.91	44.91	51.11	152.675	54	66.7	83.27	45.5
Current threshold (mV)	-41.9±1.24	-42.2±1.09	-39.7563	-39.4349	-43.4137	-42.8876	-32.014	-44.3778	-31.5865	-44.4435	-45.7259	-35.0355	-45.5908	-45.788	-39.0143	-41.2832	-48.3997	-47.6763	-45.6047		-50.3075	-40.5744	-42.0841	-35.2118	-46.2516	-37.2419	-40.0369	-42.6346	-48.6833	-35.7488	-42.7857	-37.6232	-43.402	-42.2762	-44.7095	-45.137
Input resistance (Mohm)	200.2±15.03	202.0±11.74	137.712	139.553	287.392	189.14	210.184	127.978	126.926	147.971	217.024	132.06*	241.488	257.93	211.894	291.338	292.125	148.233	176.117		229.912	158.36	203.87	148.627	233.859	187.823	168.357	151.916	272.923	272.267	162.045	126.269	251.484	232.675	186.903	244.382
Membrane capacitance (pF)	98.4±6.33	86.6±6.14	122.367	106.376	71.3741	66.9315	63.4107	369.75*	99.1172	83.2561	103.969	147.854	112.688	103.375	82.6746	93.5037	349.83*	135.61	83.2834		90.6392	75.6734	145.368	81.7518	52.9089	77.0188	73.5776	104.519	89.048	53.1125	82.179	76.8223	60.7299	110.311	121.658	89.4468
Sag ratio	0.16±0.012	0.16±0.018	0.162867	0.151574	0.191872	0.0915	0.141698	0.1644	0.194892	0.0978787	0.151731	0.2137	0.2894	0.157437	0.098	0.154406	0.128827	0.110195	0.2141		0.1296	0.1746	0.2518	0.233525	0.0726846	0.2062	0.1213	0.1044	0.2956	0.186384	0.572*	0.146027	0.234349	0.126904	0.084	0.0672963
Time constant (ms)	21.7±2.09	20.9±1.75	18.744	16.978	27.9896	14.2434	16.0604	42.73*	13.4284	35.7067	29.9058	31.3765	20.8995	29.6113	152.50*	5.34095	21.2886	31.35	18.0932		23.2997	14.6072	30.0051	14.4563	14.569	15.7963	15.0537	18.9946	32.3786	19.0824	16.8725	11.618	20.8124	30.442	24.8168	31.5277
AP amplitude (mV)	72.3±2.16	69.5±1.90	79.296	66.4553	72.8542	70.6194	30.64*	73.2816	69.2173	82.5215	62.9828	83.1185	80.3719	63.9985	82.876	69.0147	51.5721	77.5362	70.7296		64.6216	61.0574	80.386	61.898	55.1644	67.9051	75.8484	67.295	68.0664	73.0209	75.0574	74.4787	41.73*	72.1548	80.8708	64.4075
AP half-width (msec)	0.74±0.04	0.75±0.06	0.518	0.668333	0.7208	0.529909	0.864	0.7316	0.499875	0.7234	0.8592	0.60325	0.871	0.868625	0.622857	0.910167	1.19639	0.647	0.6742		1.24025	0.658714	0.675333	0.611417	0.809545	0.5651	0.491	0.606182	0.8856	0.572333	0.6848	0.5706	1.19	0.768	0.629	1.06545
AHP (mV)	-13.1±1.31	-14.3±1.54	-22.2614	-7.77121	-12.5742	-18.0973	-11.5088	-8.18113	-21.3242	-12.3901	-9.83182	-15.2903	-8.22425	-10.9334	-22.4869	-16.5946	-4.70644	-8.60198	-12.3308		-6.28871	-19.485	-11.2512	-19.4142	-10.4204	-24.7406	-23.9712	-18.5486	-10.0291	-20.5762	-15.7638	-5.29405	-8.4398	-12.2717	-9.26086	-13.6265
AHP time to peak (ms)	2.1±0.15	2.1±0.23	1.35	2.6333	1.92	1.3636	3.1667	2.02	1.2906	1.7	3	1.5	1.9667	2.7875	1.7429	2.4333	2.8304	1.72	1.5667		3.55	1.7	1.8167	1.7	2.76	1.53	1.3333	1.6636	3.4571	1.3667	1.4	1.42	4.3	1.8	1.68	2.6636
dv/dtmin (mV/ms)	-113.8±9.41	-114.0±10.56	-180.36	-105.333	-111.537	-155.324	-40.0617	-101.738	-172.242	-121.402	-77.142	-149.944	-92.7649	-126.691	-126.691	-82.8088	-48.2224	-120.415	-122.76		-57.2971	-117.906	-118.869	-117.746	-80.2028	-151.784	-194.444	-131.858	-81.1206	-162.987	-114.168	-154.482	-38.1904	-96.126	-140.21	-66.6614
dv/dtmax (mV/ms)	204.5±13.56	187.3±13.01	265.115	211.982	185.72	226.709	77.2187	231.097	229.282	266.479	179.209	283.857	207.926	249.13	177.565	144.902	103.779	230.899	204.856		127.747	155.439	275.607	193.758	133.203	198.609	240.808	193.826	172.369	199.048	221.562	231.427	88.4534	199.048	249.511	116.762
Interspike interval (ms)	53.0±4.09	43.4±3.7	54.0462	70.0375	46.5643	67.09	24.556	46.85	23.5161	66.7	76.1889	71.7	59.1909	53.1308	33.925	57.6091	32.7818	45.6538	71.7333		48.3571	21.2059	67.1111	57.1545	33.0591	25.2071	35.505	37.7556	45.7267	21.3294	52.4583	63.8364	45.6267	56.0889	56.65	59.82
Adaptation ratio	0.57±0.04	0.61±0.04	0.378223	0.62579	0.625	0.493369	0.504545	0.410822	0.75	0.462871	0.480477	0.70696	0.500703	0.790441	0.746356	0.76874	0.314121	0.418182	0.751914		0.808765	0.8	0.434091	0.535022	0.720539	0.547718	0.597403	0.388747	0.743271	0.806604	0.480545	0.537931	0.743539	0.263221	0.64375	0.754601
blue	statistical outlier
blue + bold	unpropper fit
